# Supplementary material for: Ultraflexible organic amplifier with biocompatible gel electrodes
Source: PubMed Central journal article supplement (PMC5411732; doi:10.1038/ncomms11425), 2016-04-29
Supplement: ncomms11425-s1.pdf [file ncomms11425-s1.pdf]

**A**

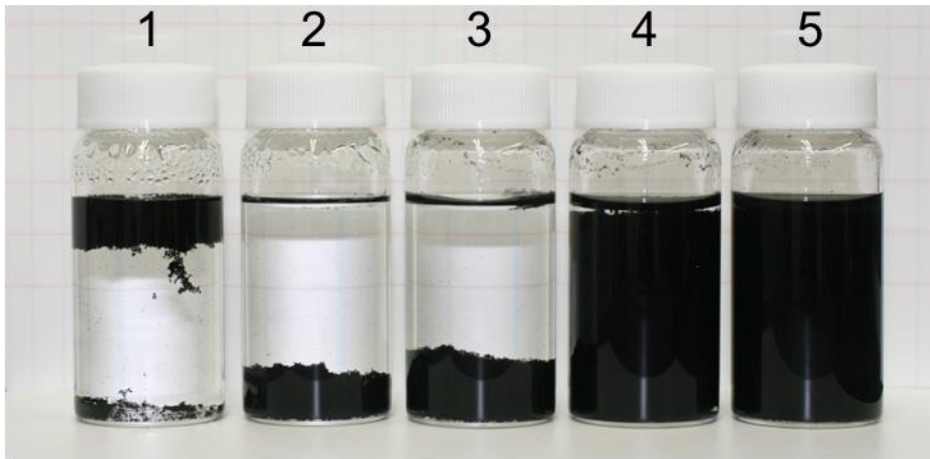

**B**

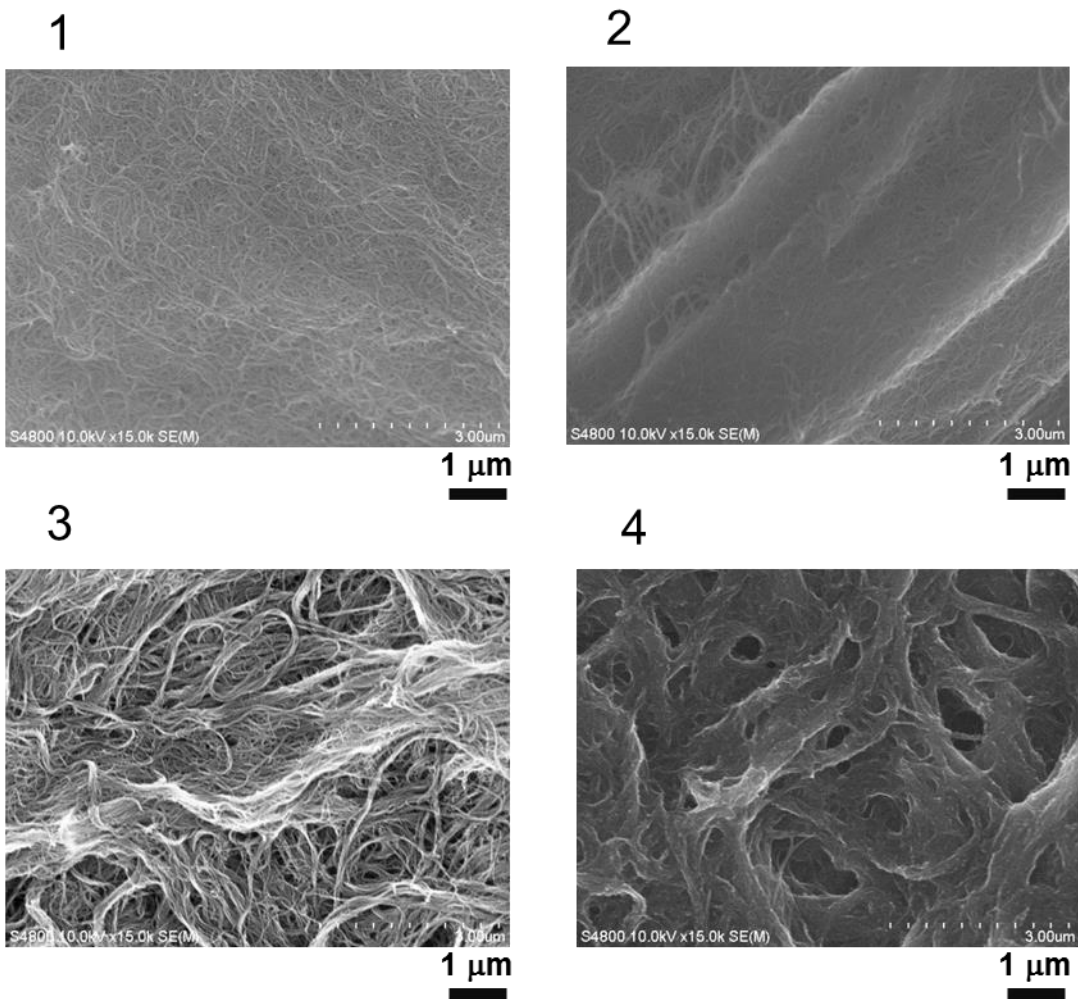

**Supplementary Figure 1**  
**Water dispersibility of carbon nanotubes (CNTs)**

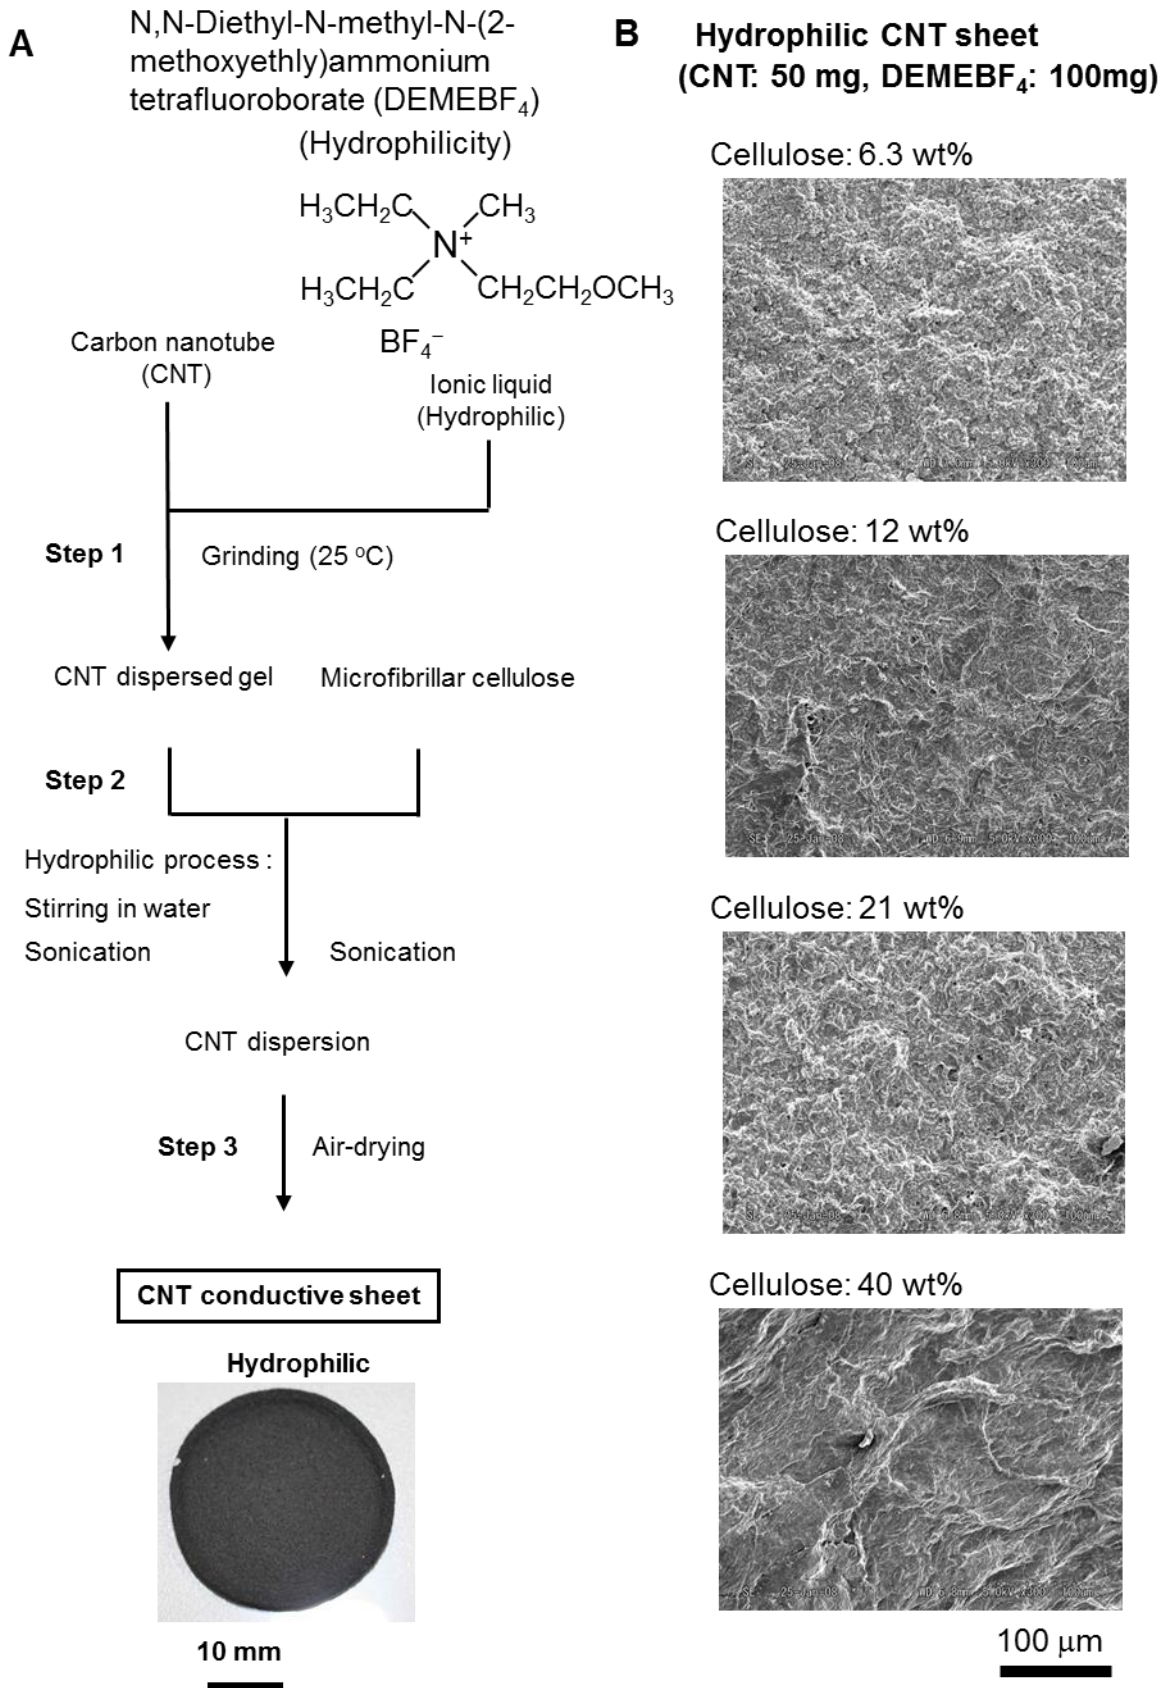

Supplementary Figure 2

Manufacturing process of CNT composite sheet (CNT sheet)

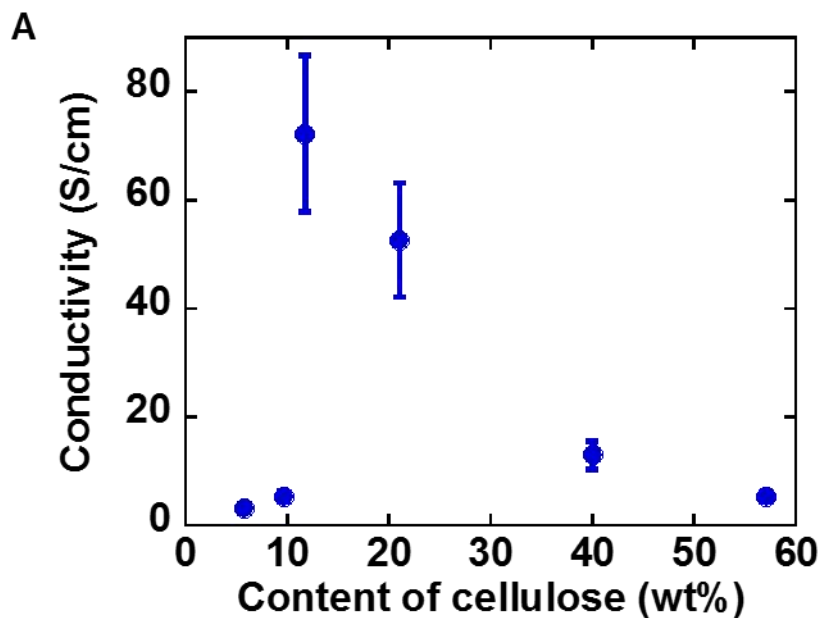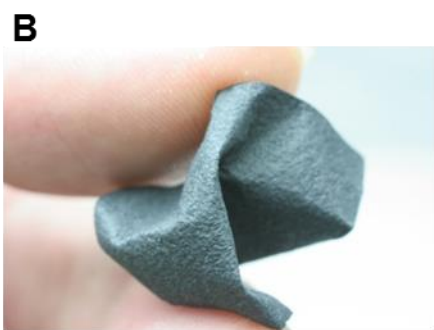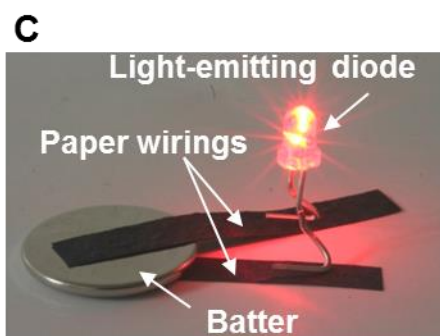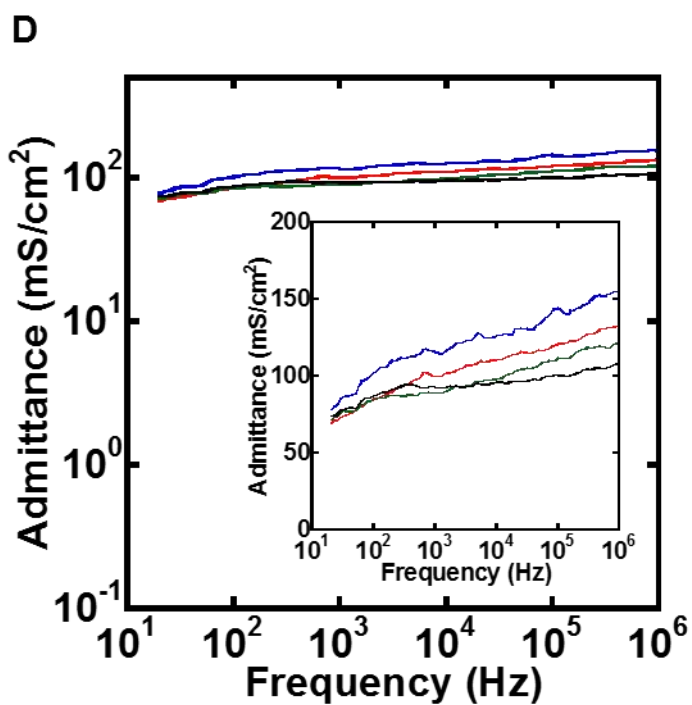

Supplementary Figure 3

Characteristics of CNT composite sheet (CNT sheet)

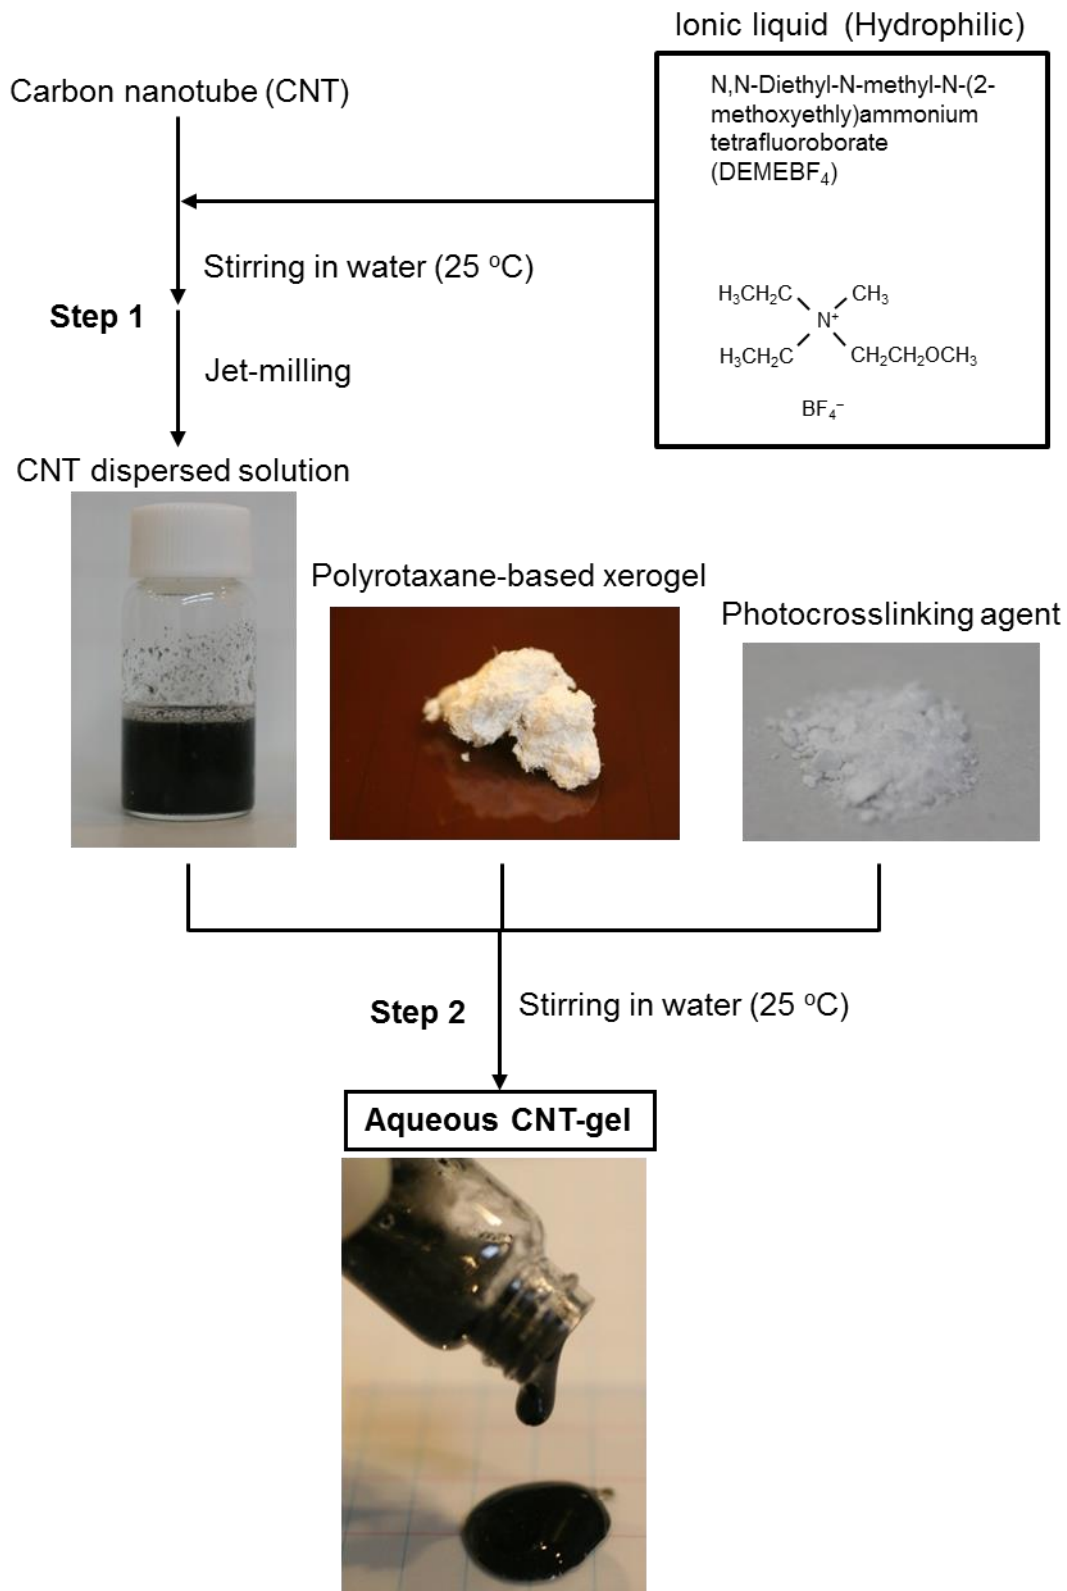

Supplementary Figure 4

Another manufacturing process of CNT/gel composite 1

**Aqueous CNT-gel**

Cast on glass

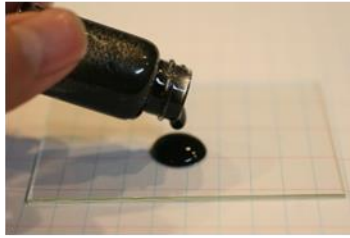

Spacer sheet & cover glass

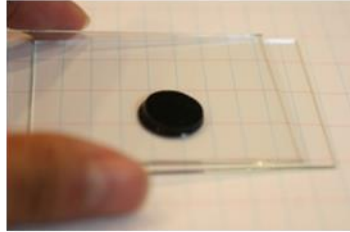

**Step 3**

UV exposure (365 nm)

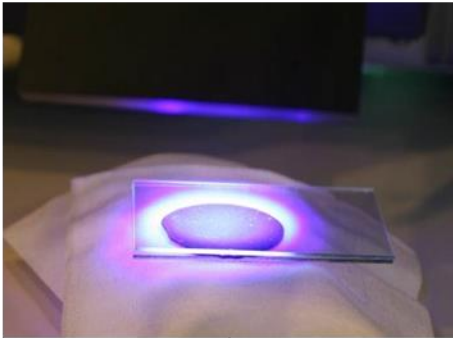

Photocrosslinking

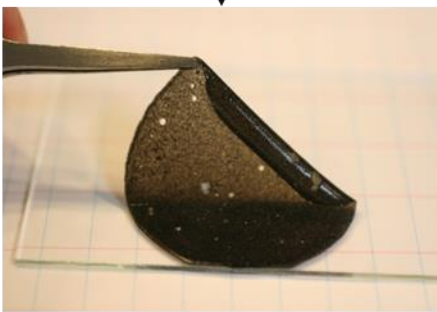

A sheet of a 50- $\mu$ m-thick CNT conductive gel

Digital UV exposure (365 nm)

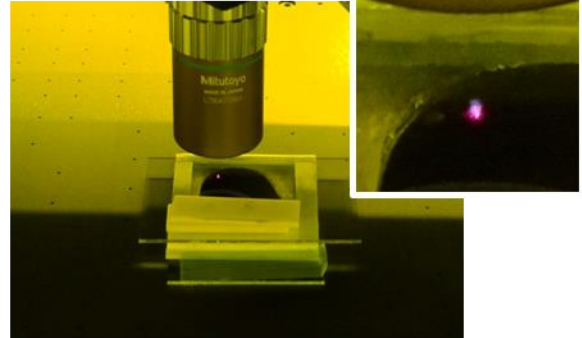

Photocrosslinking

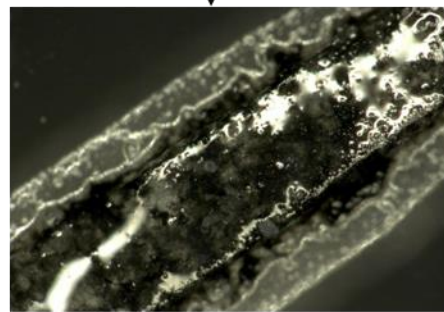

CNT conductive gel with 50- $\mu$ m-width

**Supplementary Figure 5**

**Another manufacturing process of CNT/gel composite 2**



A. CNT

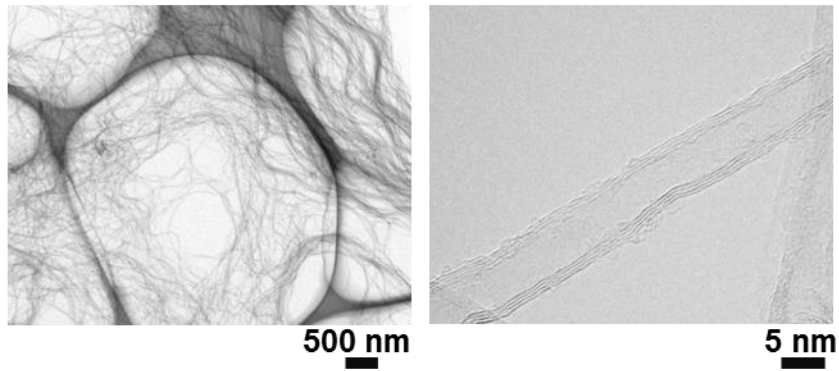

B. CNT + polyrotaxane-based gel

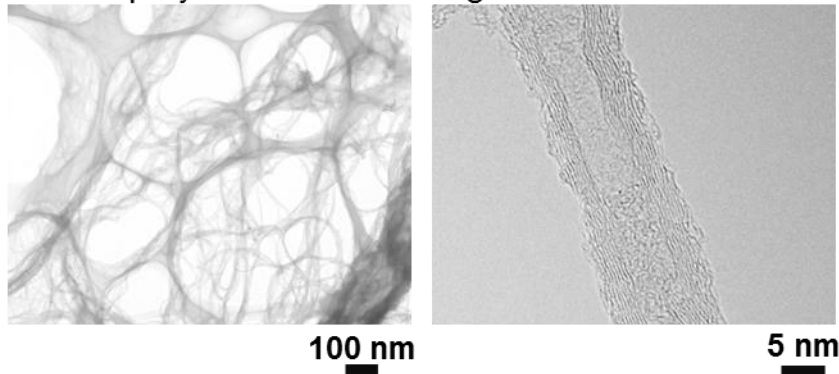

C. CNT + ionic liquid + polyrotaxane-based gel

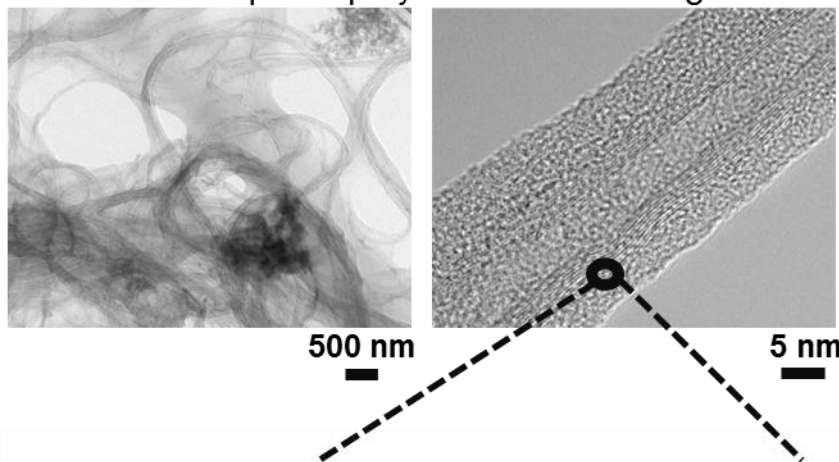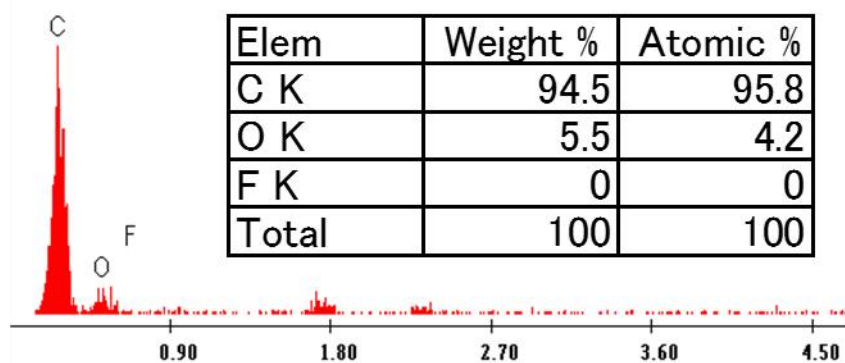

Supplementary Figure 6

Transmission electron microscopy (TEM) observation of CNT/rotaxane composite

**A**  
**Procedure of colony forming assay**

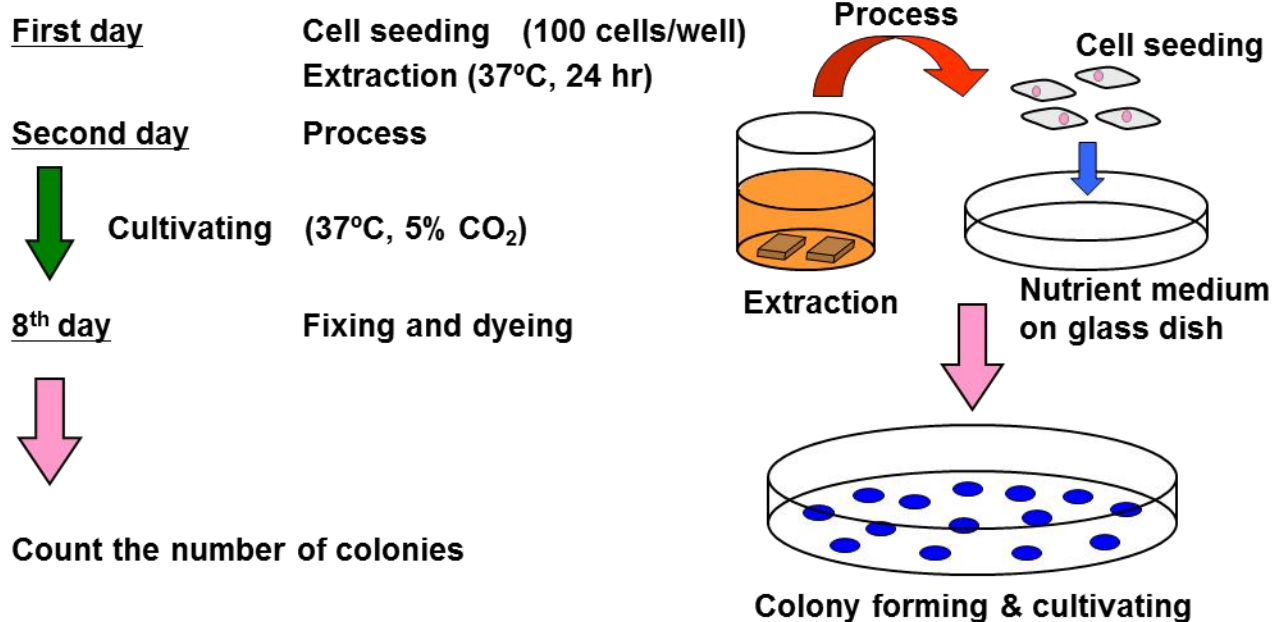

**B**  
Control (polyethylene sheet)

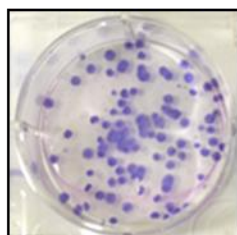

Polyrotaxane-based gel

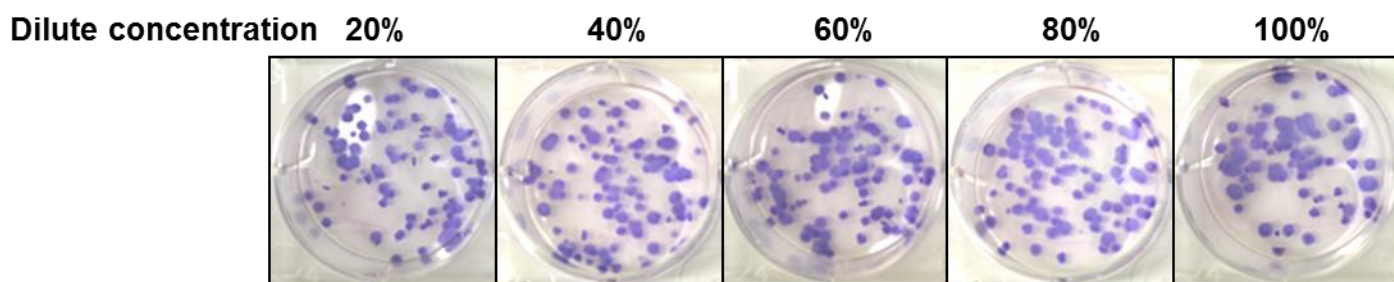

Polyrotaxane-based + CNT

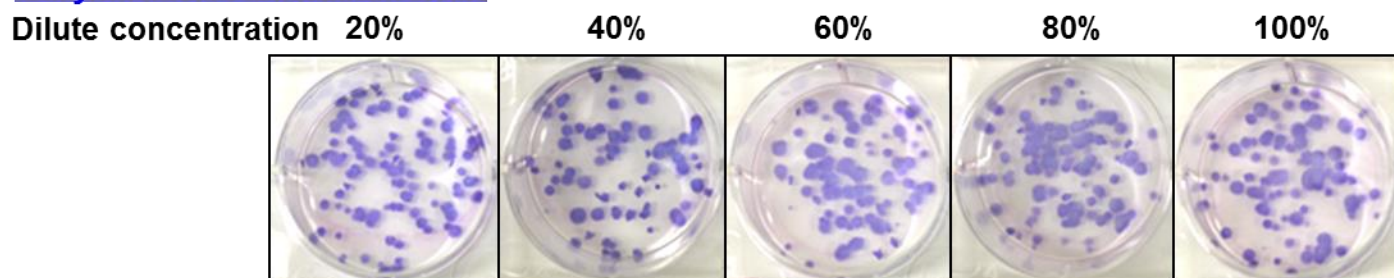

Supplementary Figure 7

Colony-forming assay for cytotoxic evaluation

## A Implanted electrodes

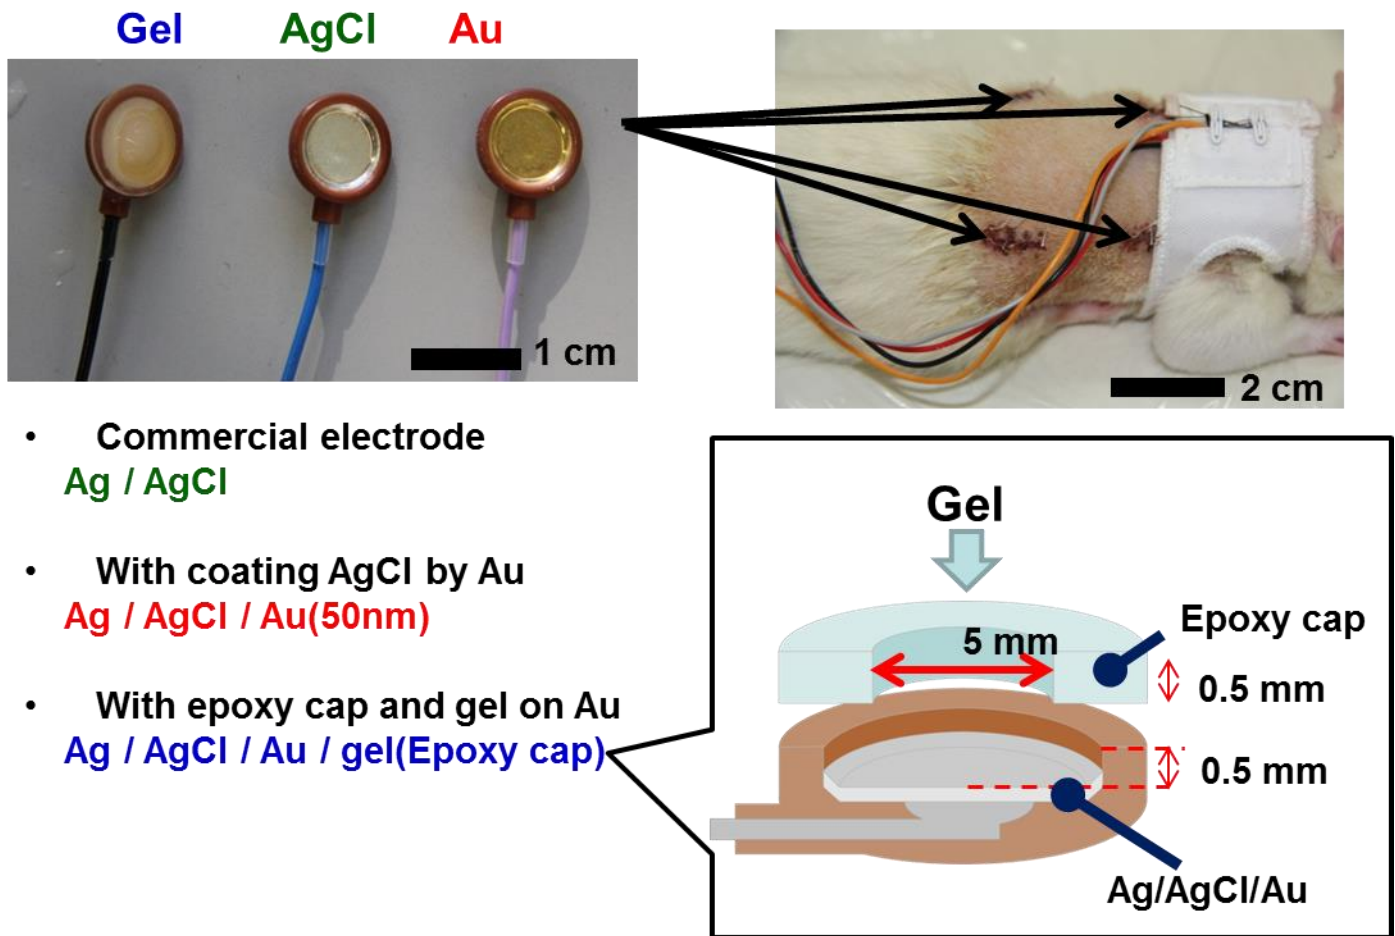

## B Condition for implanting and measurement

- Each electrode was implanted by 6 pairs.

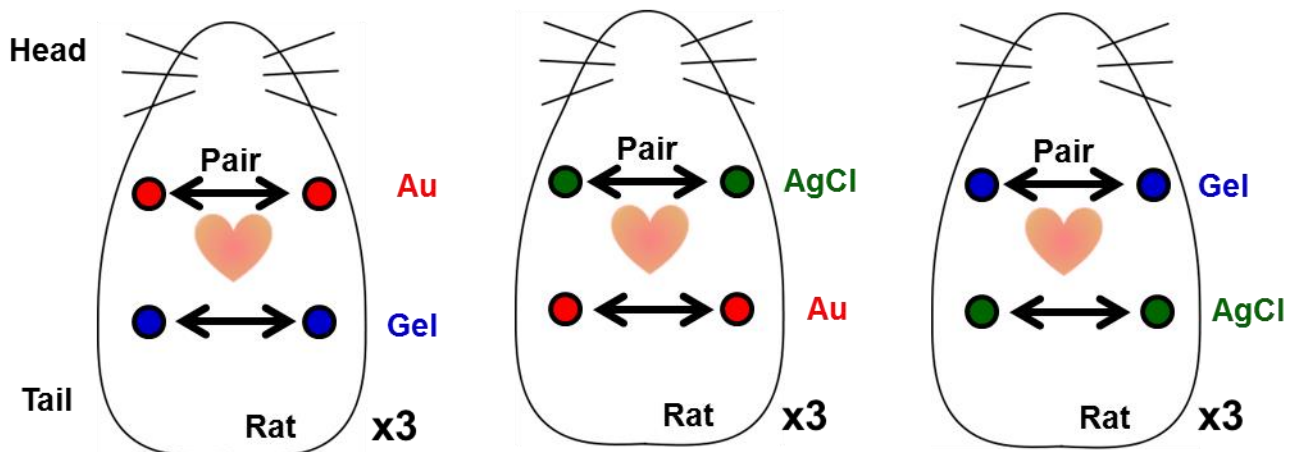

- Current with **< 0.1 mA** to avoid inflammation by continuous impedance measurements

Supplementary Figure 8

Implant assay for biocompatibility evaluation



**Gel electrode**

**Au electrode**

**AgCl electrode**

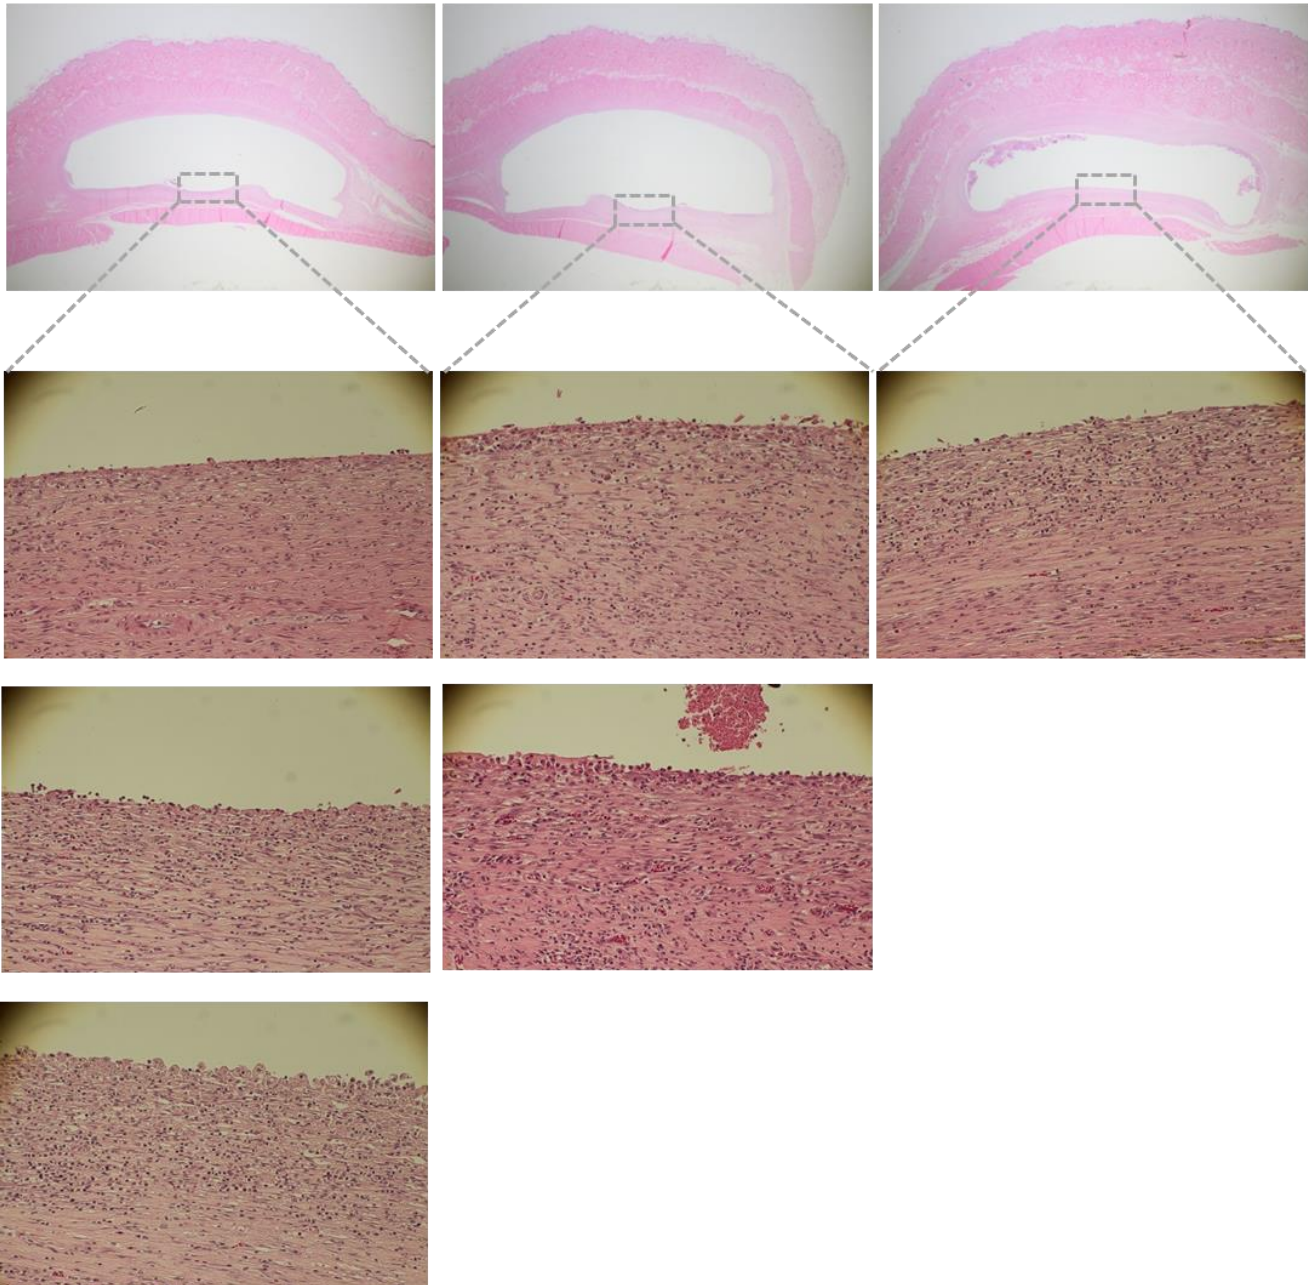

**Supplementary Figure 9**

**Magnified cross-sectional images of the graft pathology by staining a subcutaneous tissue after an electrode was explanted**

## 4-week implantation

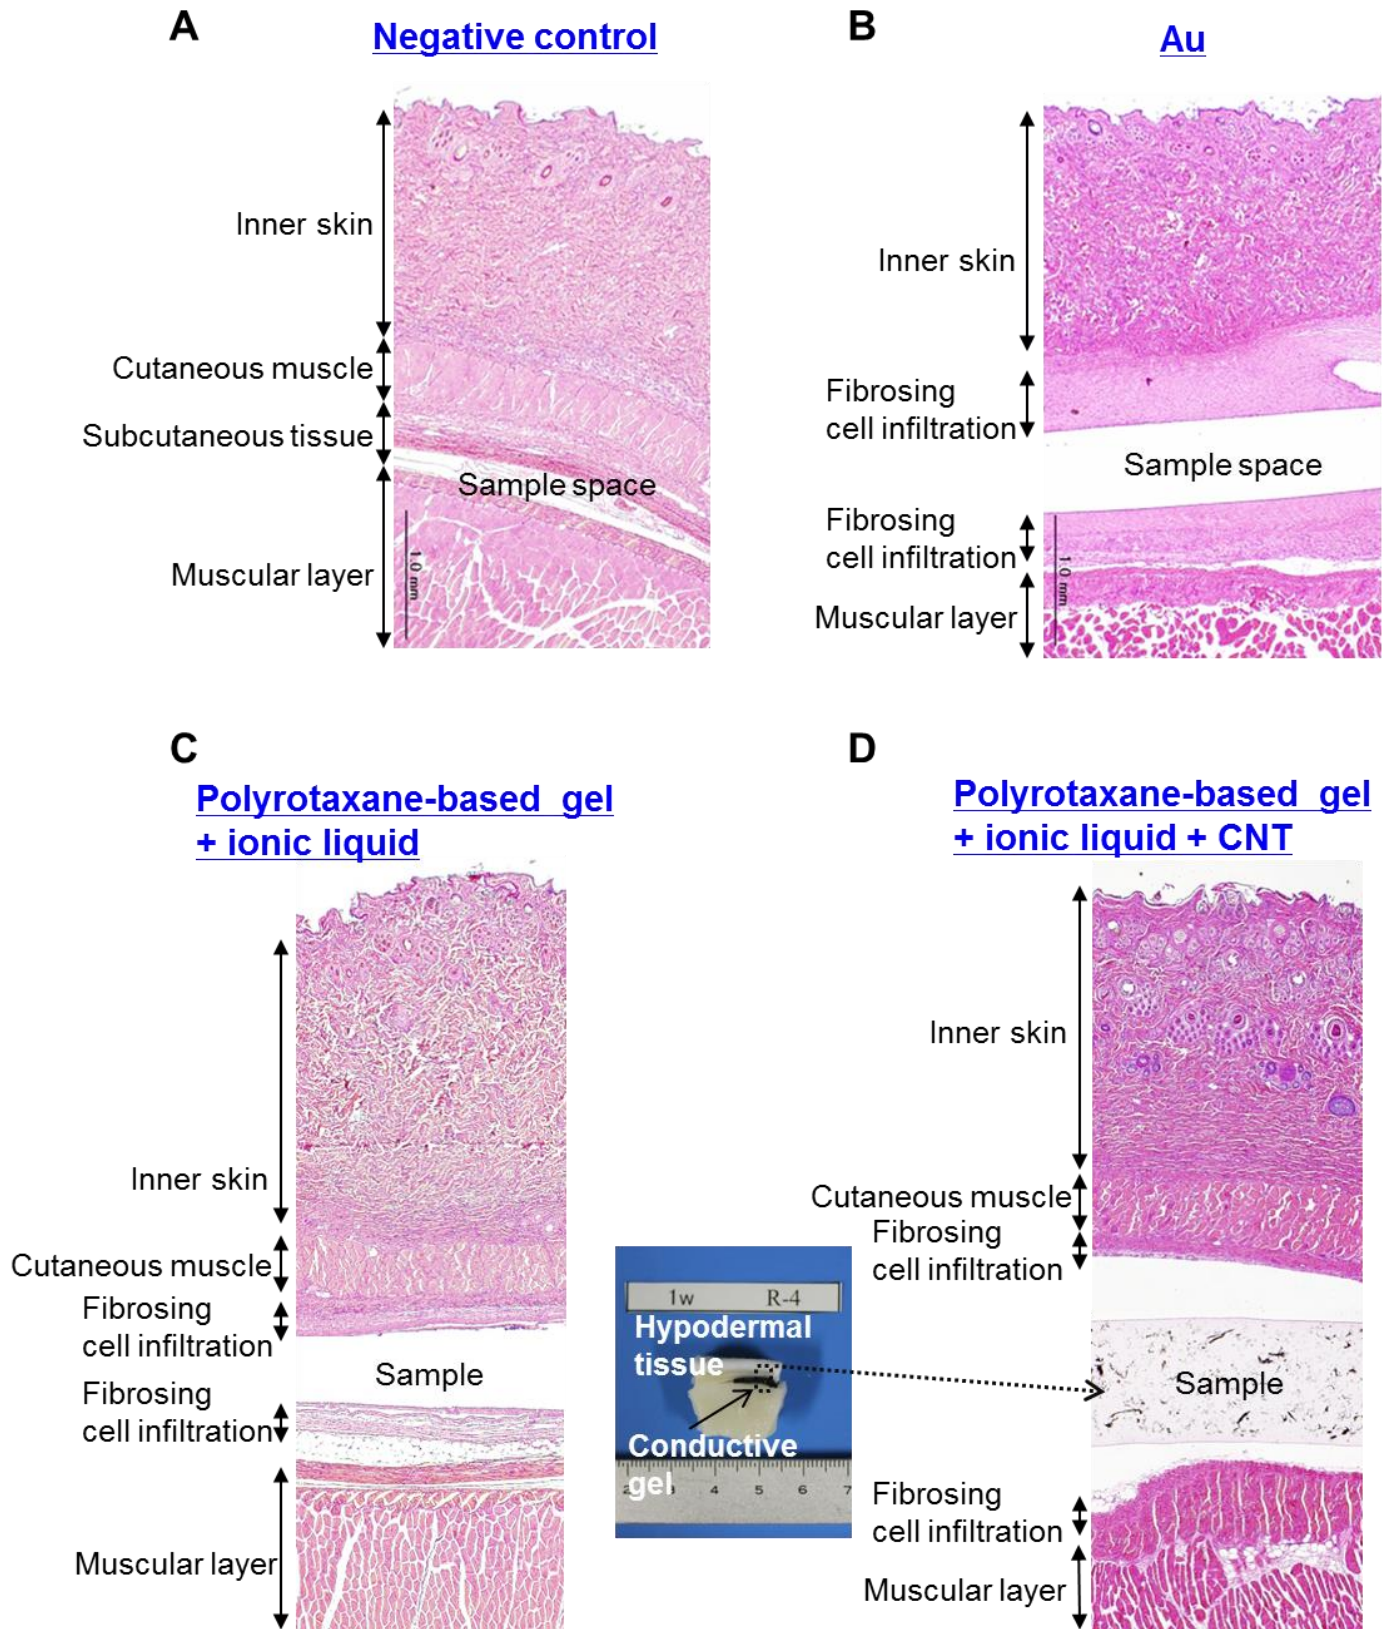

Supplementary Figure 10

Graft pathologies of the four different samples after implantation for four weeks

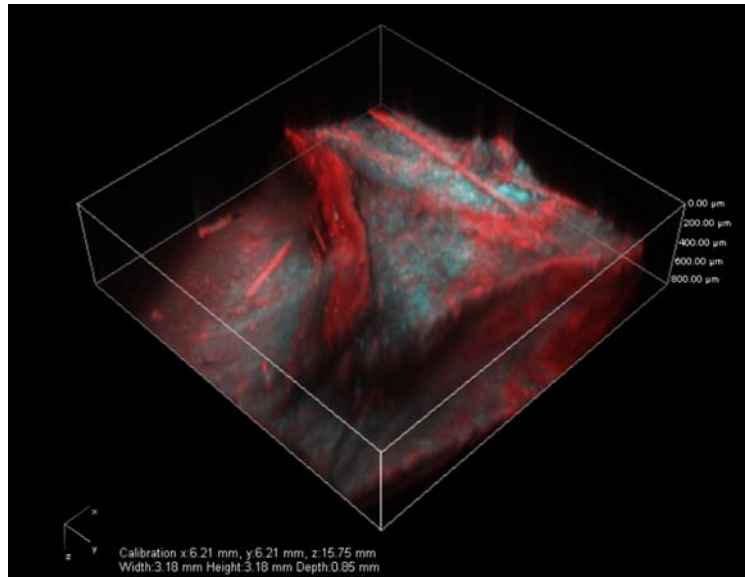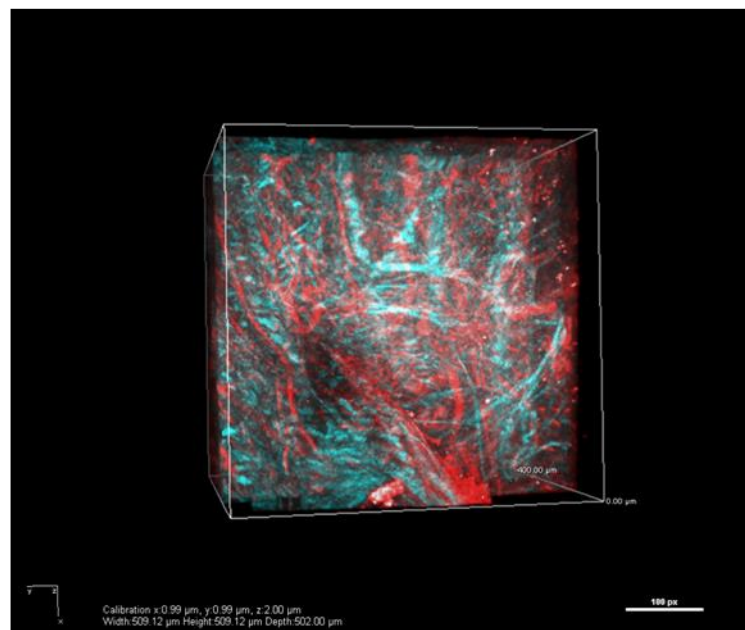

**Supplementary Figure 11**

**Procedures of perfusion fixation, tissue-cleaning method, and evaluation using multiphoton microscopy**



**A**

### Procedure of implant tolerance test

Sterilization at 121 °C for 20 min using Autoclaving method

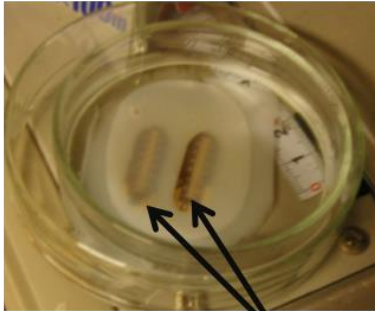

Implantation of organic transistors into hypodermal tissue of goat

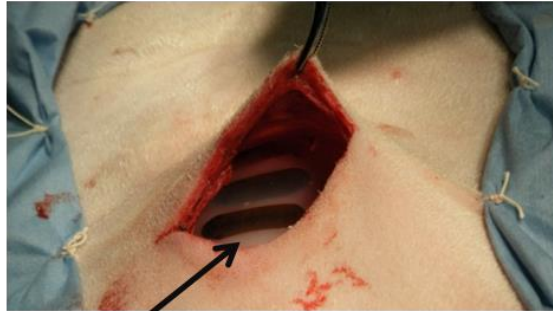

40 organic transistors

**B**

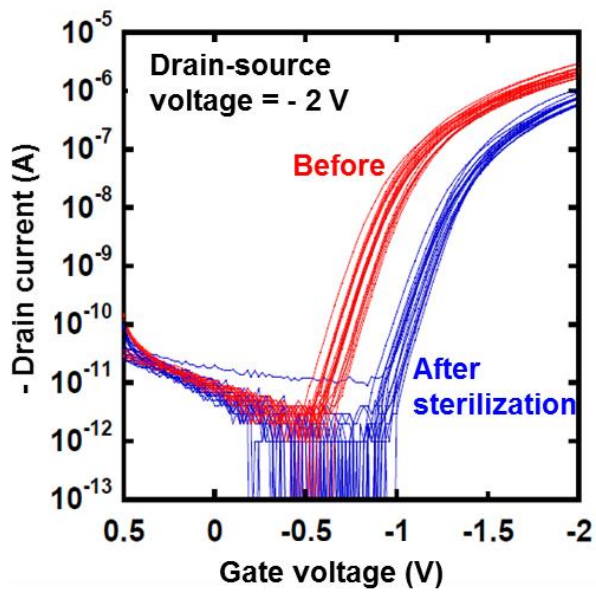

**C**

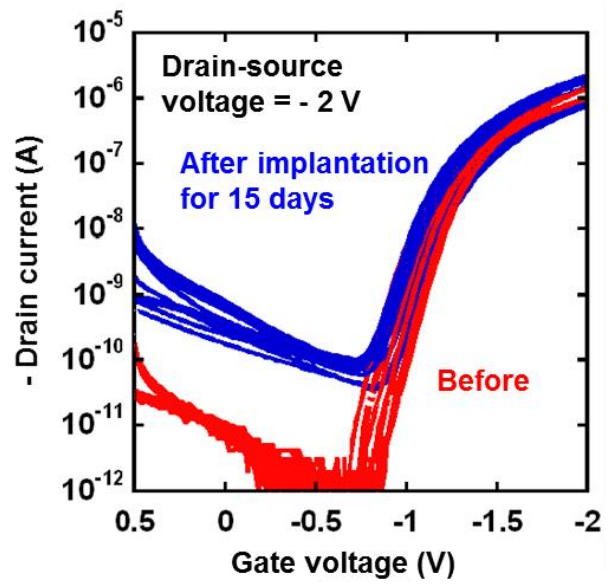

Supplementary Figure 12

In vivo implant tolerance of organic transistors



**A**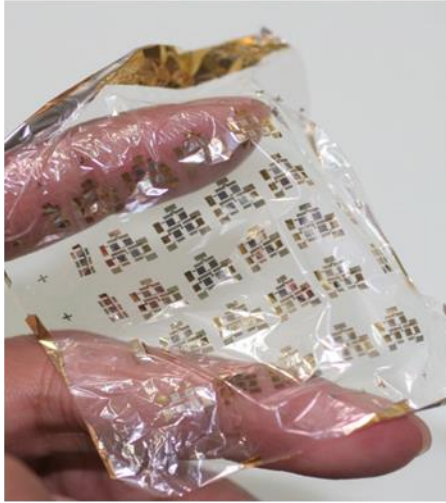**B**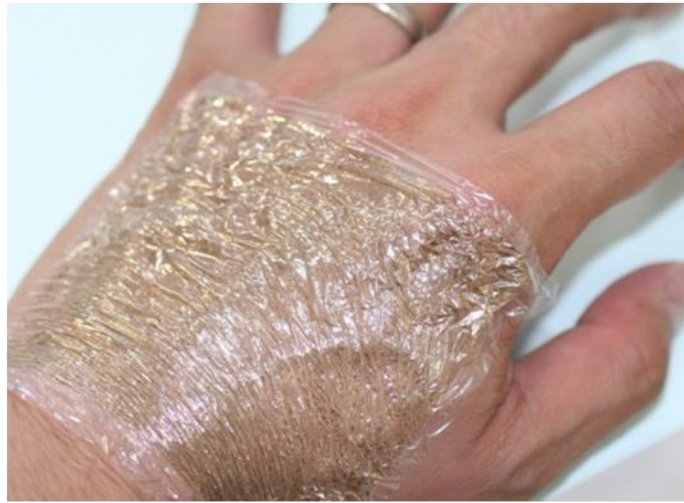**C**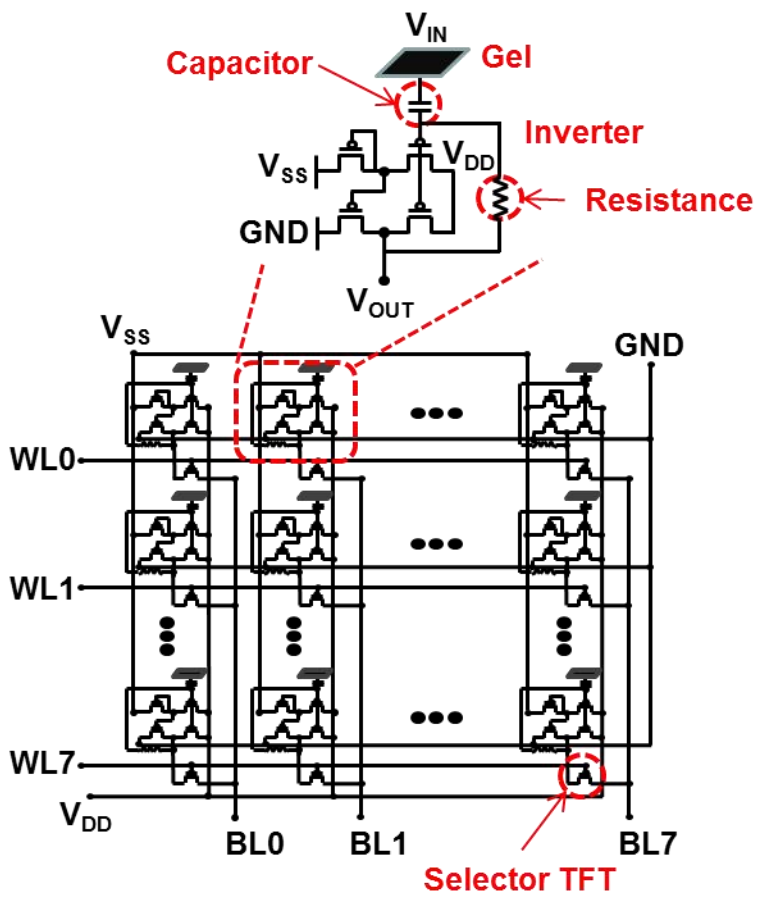**D**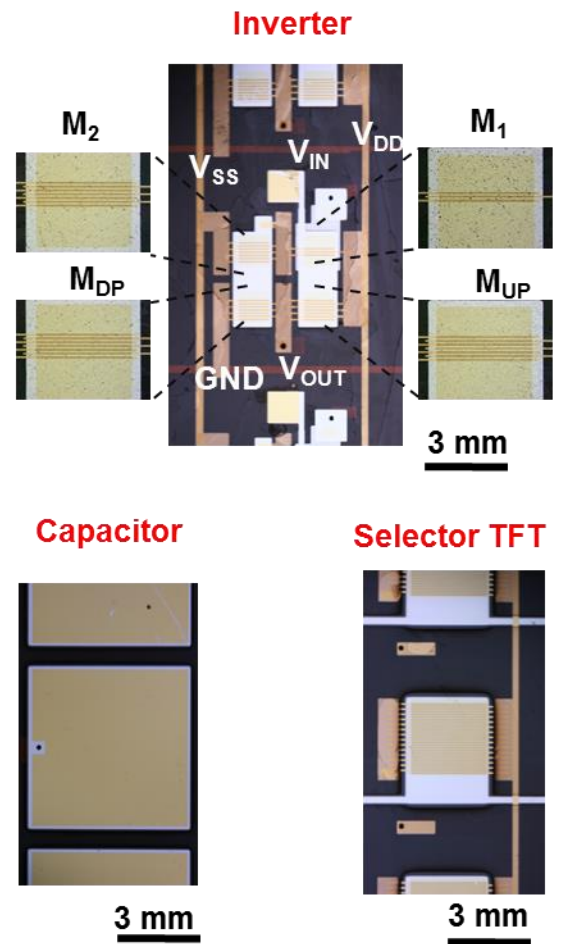

Supplementary Figure 13  
1.2- $\mu\text{m}$ -thick organic circuits

**A**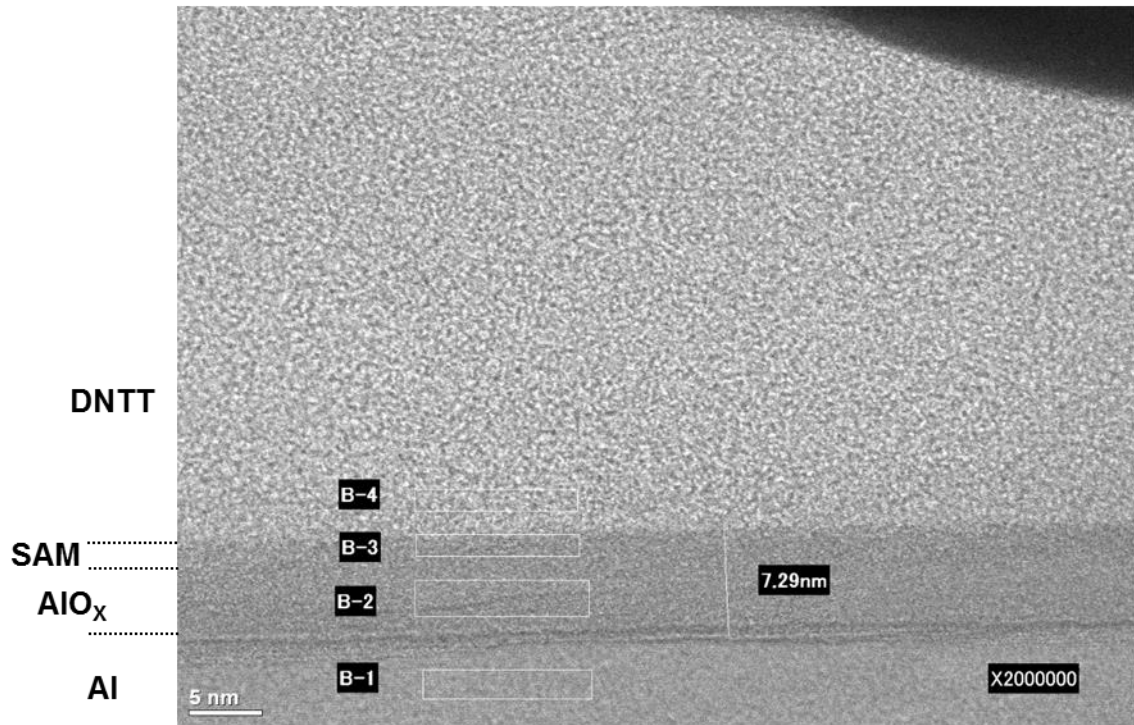**B**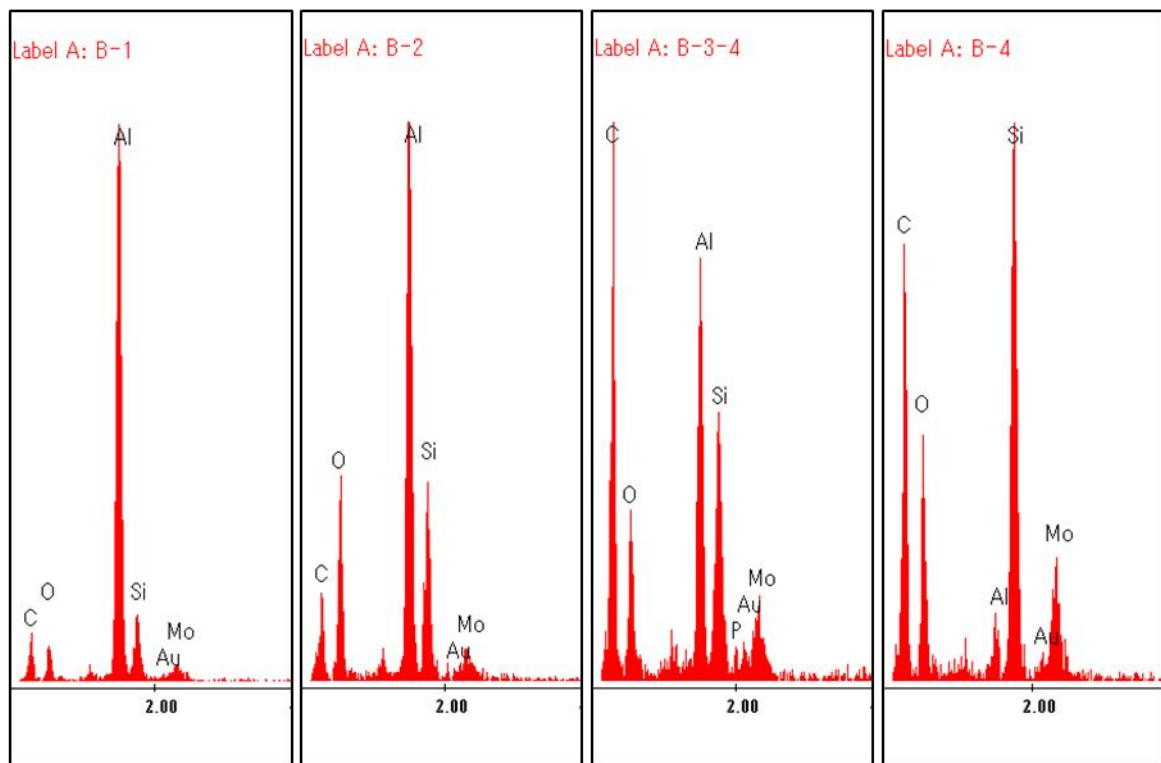

Supplementary Figure 14

Material profiling and cross-sectional image of organic transistors on a 1.2- $\mu$ m-thick substrate using ultrahigh resolution scanning TEM (STEM) and EDX analysis system

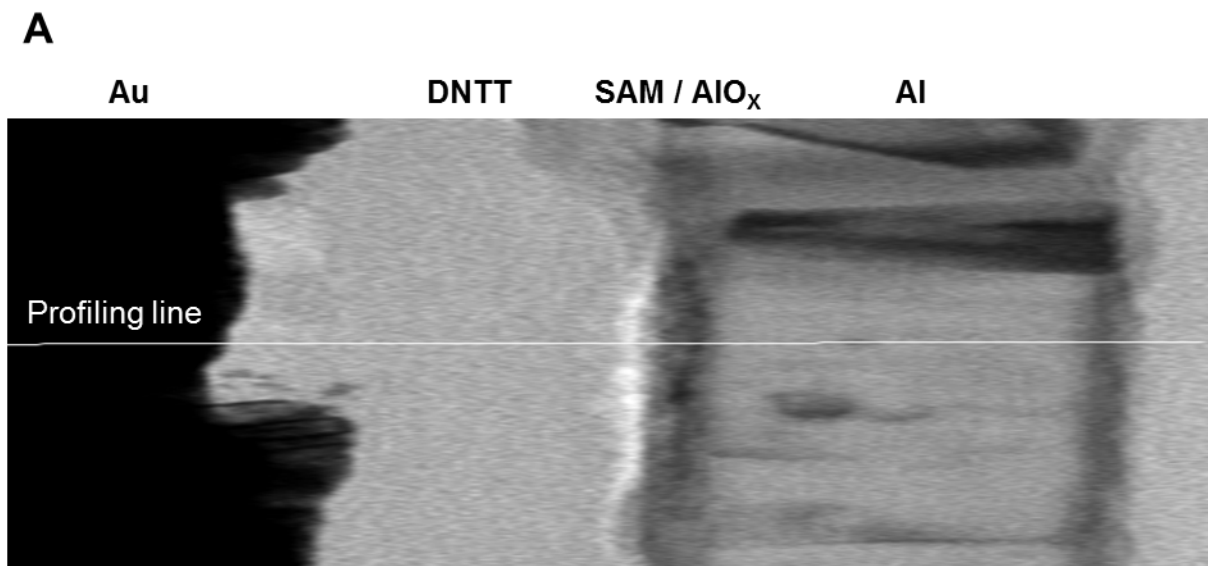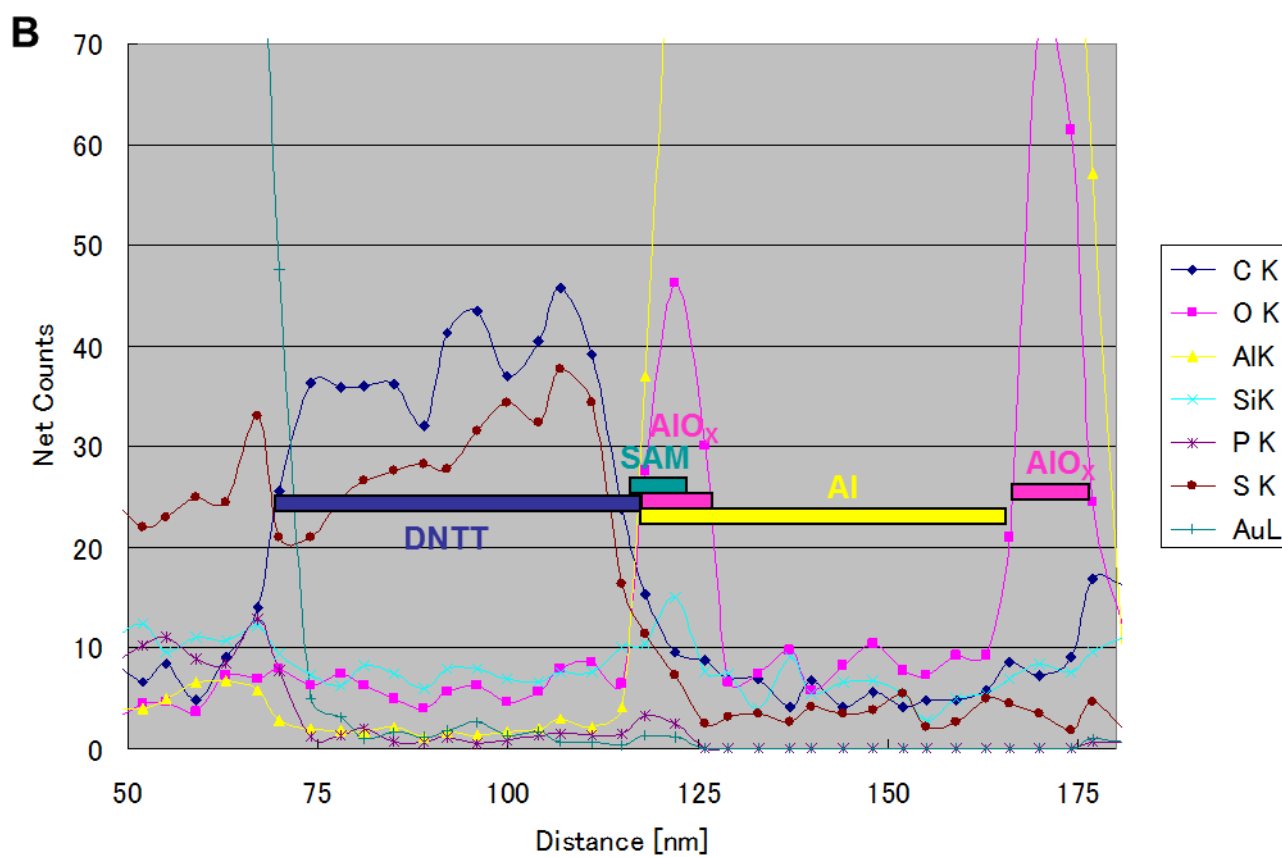

Supplementary Figure 15

Material profiling and cross-sectional image of organic transistors on a 1.2- $\mu\text{m}$ -thick substrate using ultrahigh resolution scanning TEM (STEM) and EDX analysis system

**DNTT morphology  
on SAM gate dielectric  
with SiO<sub>2</sub> substrate**

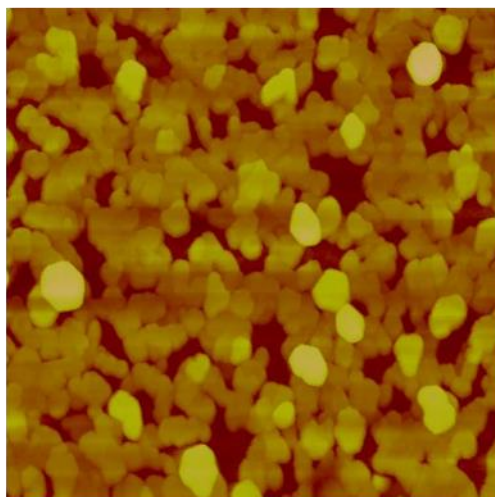

**50 μm x 50 μm scan**

**DNTT morphology  
on SAM gate dielectric  
with 1-μm-thick PEN substrate**

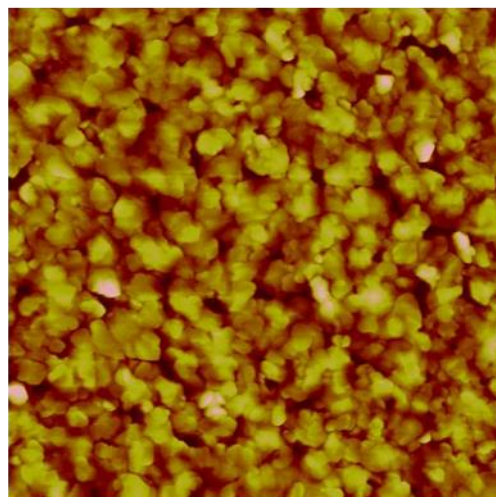

**50 μm x 50 μm scan**

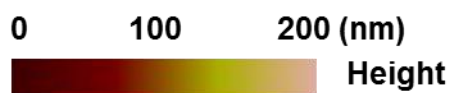

**Supplementary Figure 16  
Morphology of DNTT on SAM**



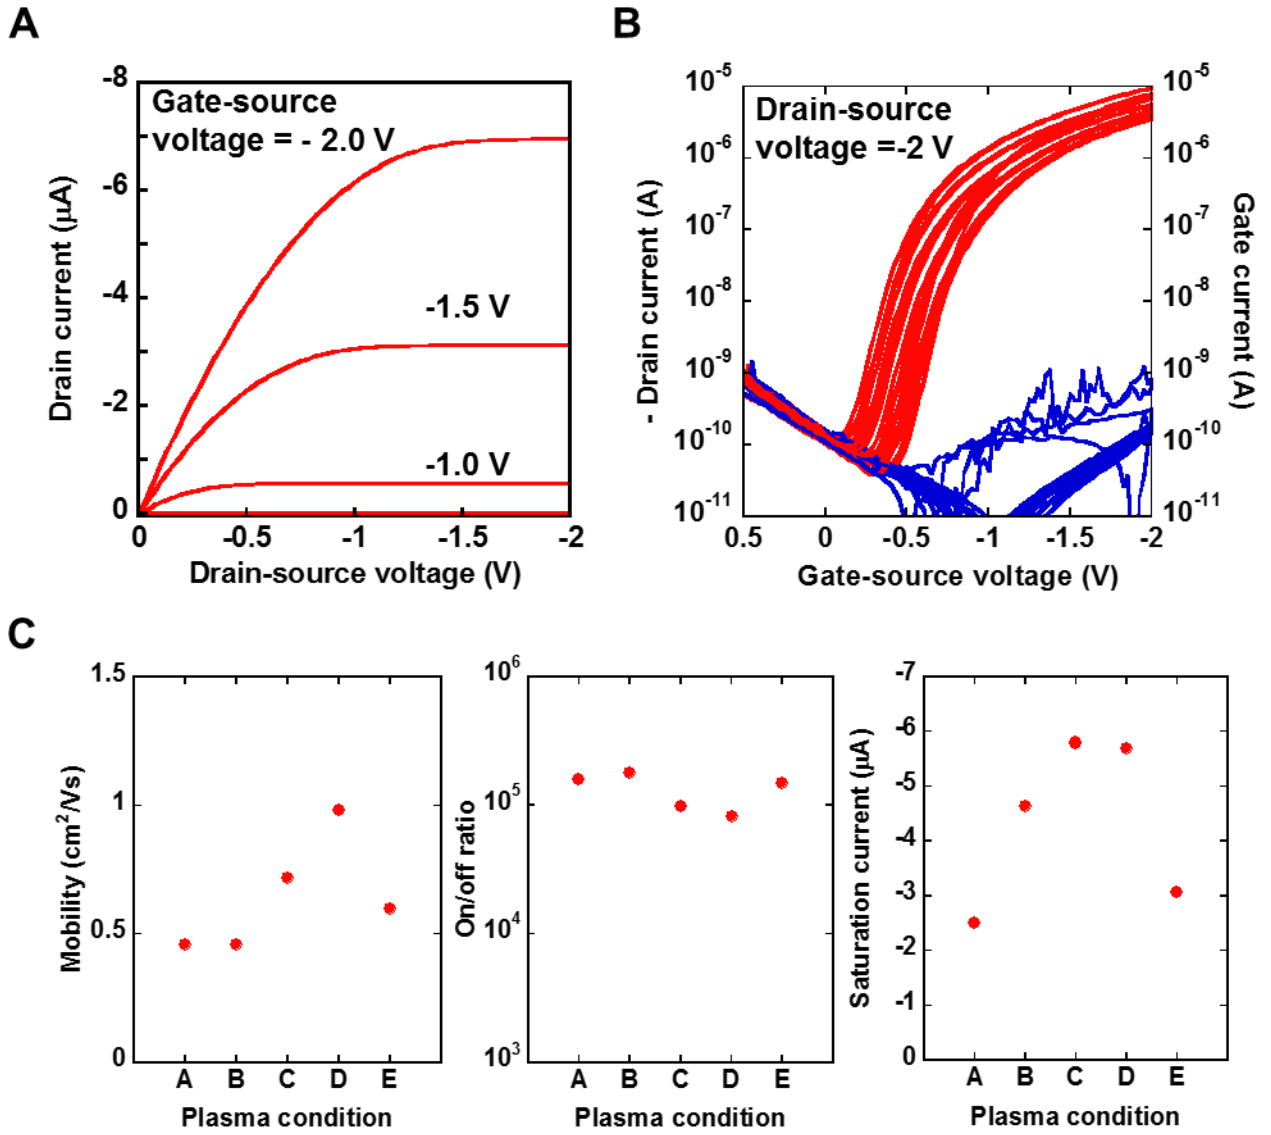

Supplementary Figure 17

Optimization of the manufacturing process on a 1- $\mu\text{m}$ -thick substrate

**A**

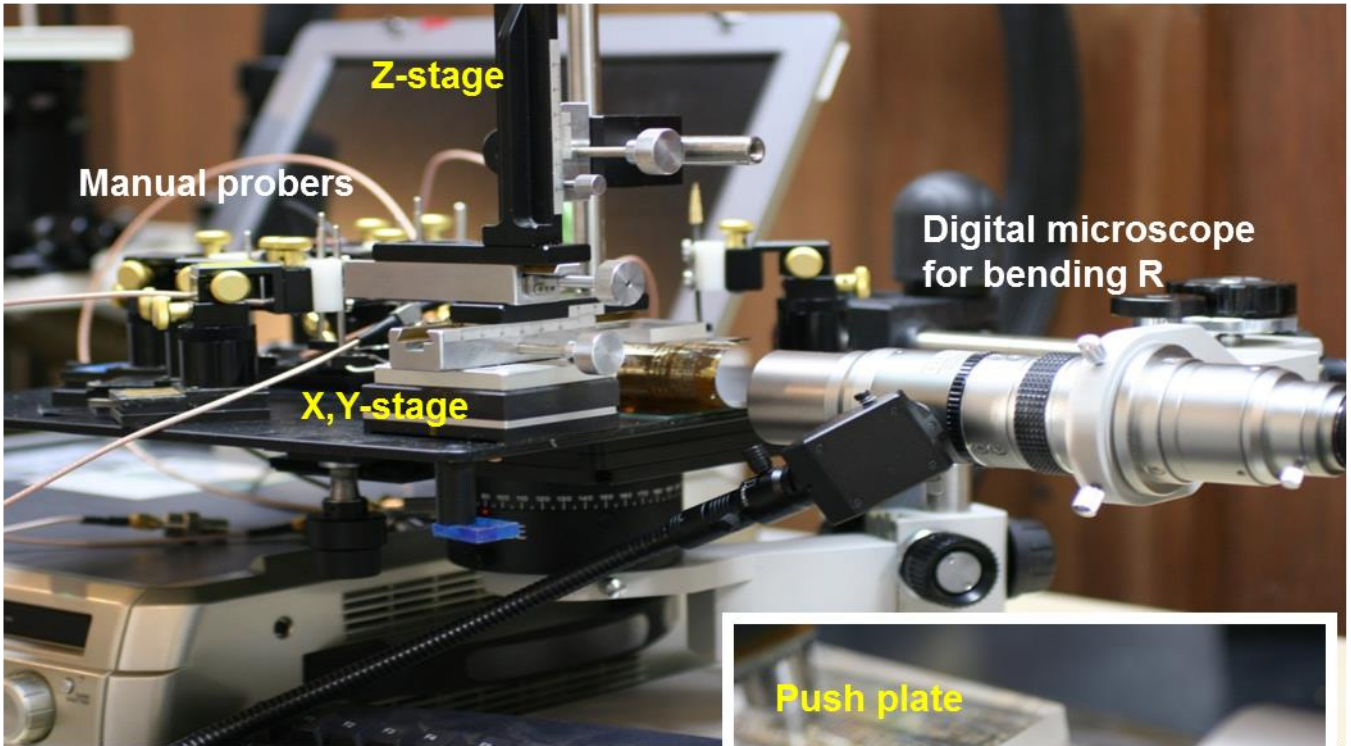

**Agilent: B1500A**  
**Microscope: KEYENCE**

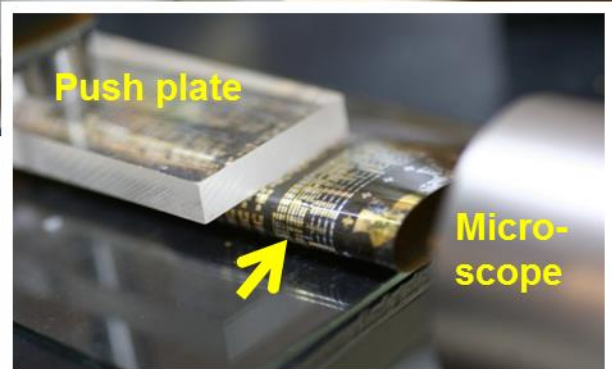

**Supplementary Figure 18**  
**Bending test**

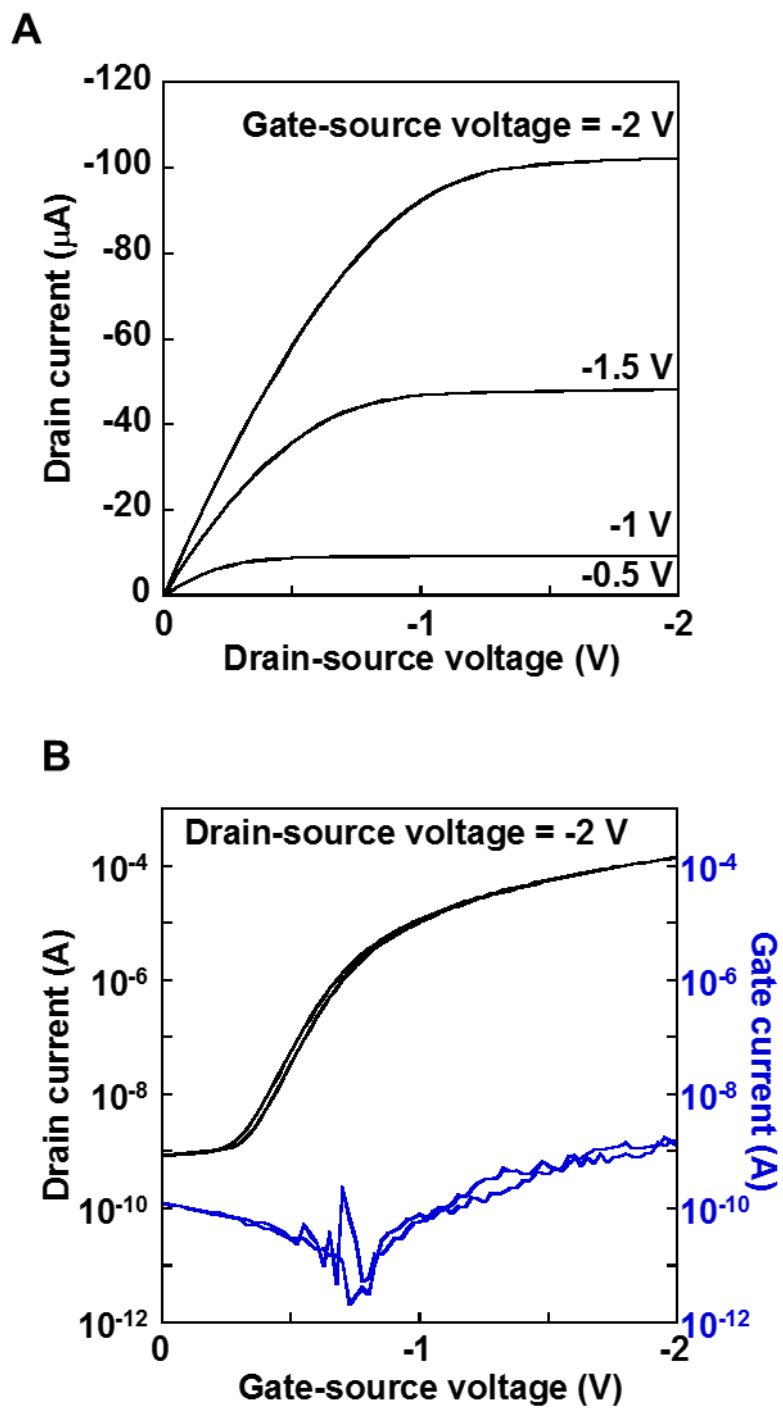

Supplementary Figure 19

Design of organic transistor for higher amplifier gain

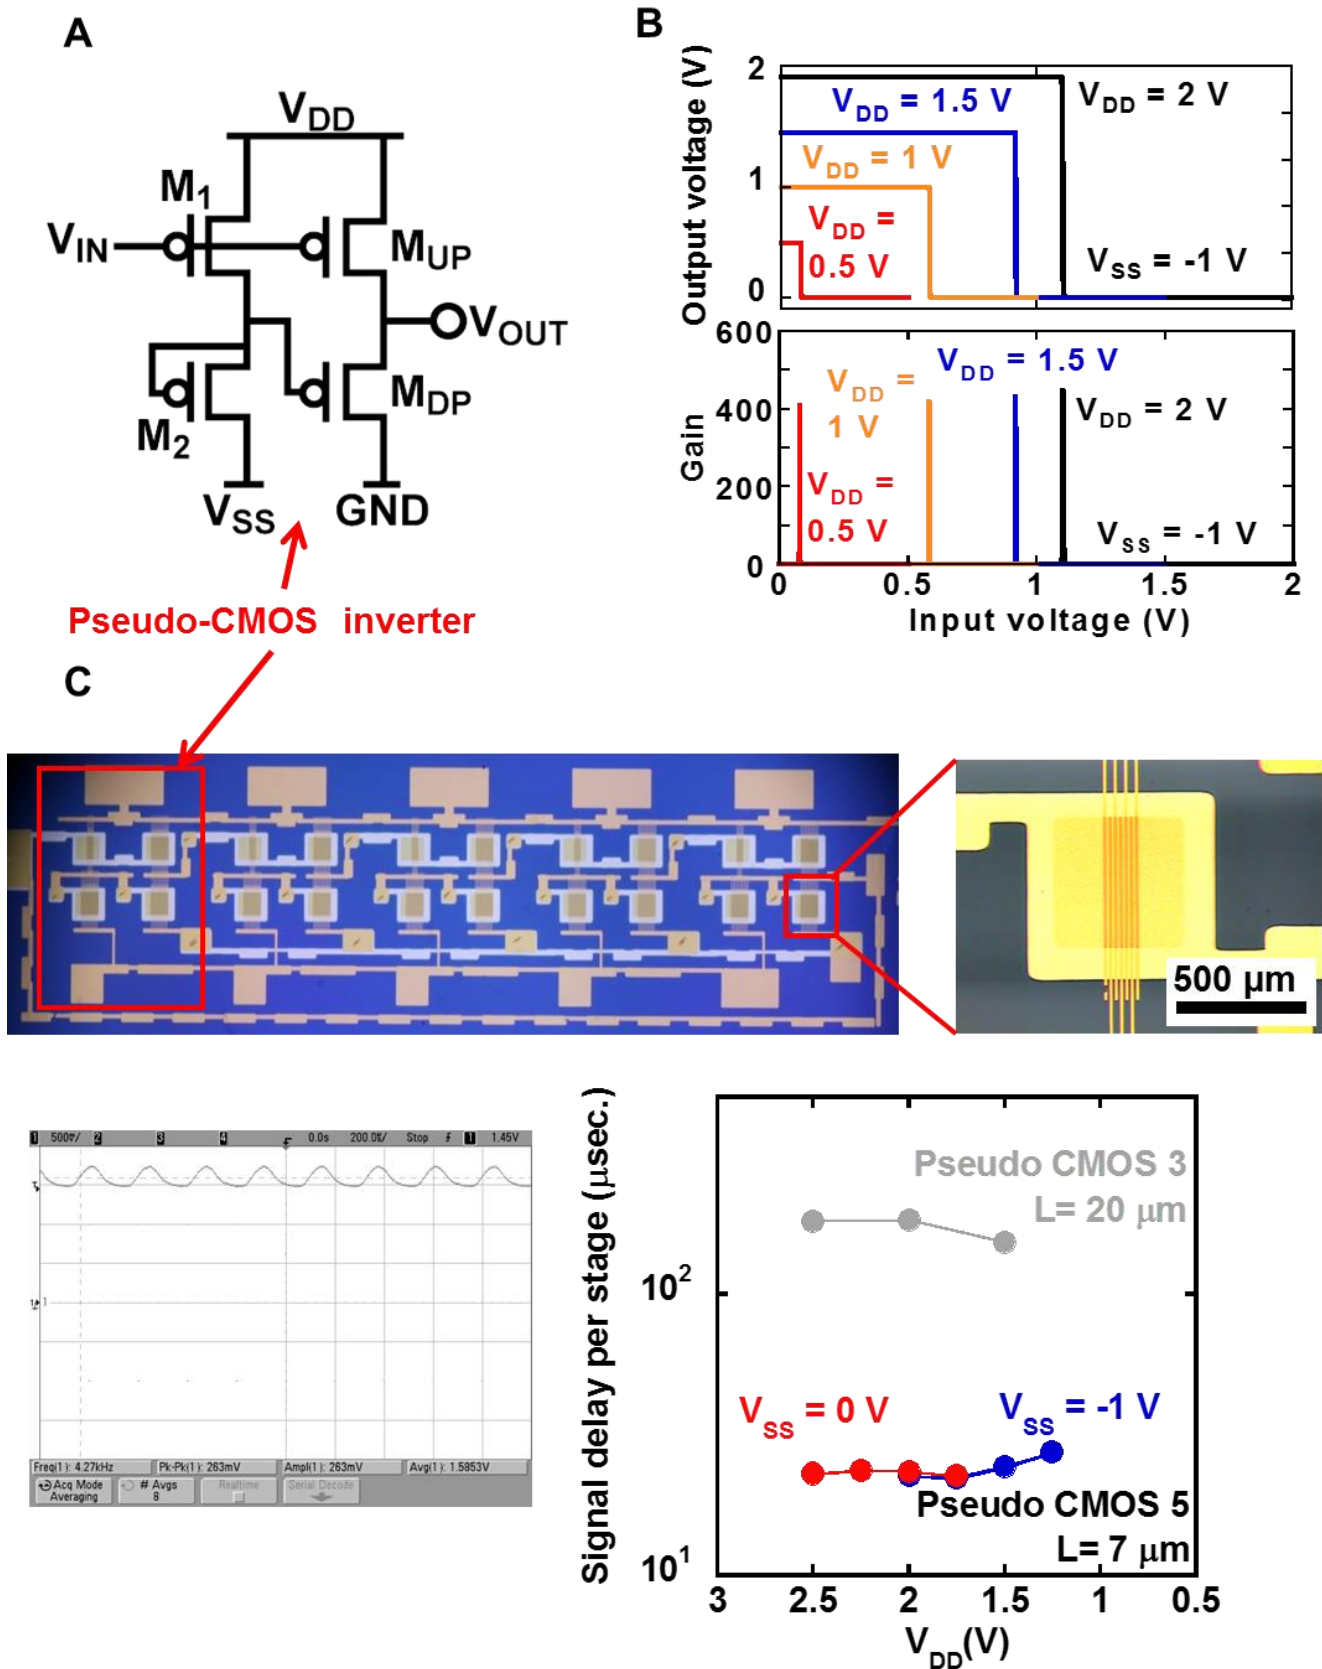

Supplementary Figure 20  
Pseudo-CMOS inverter



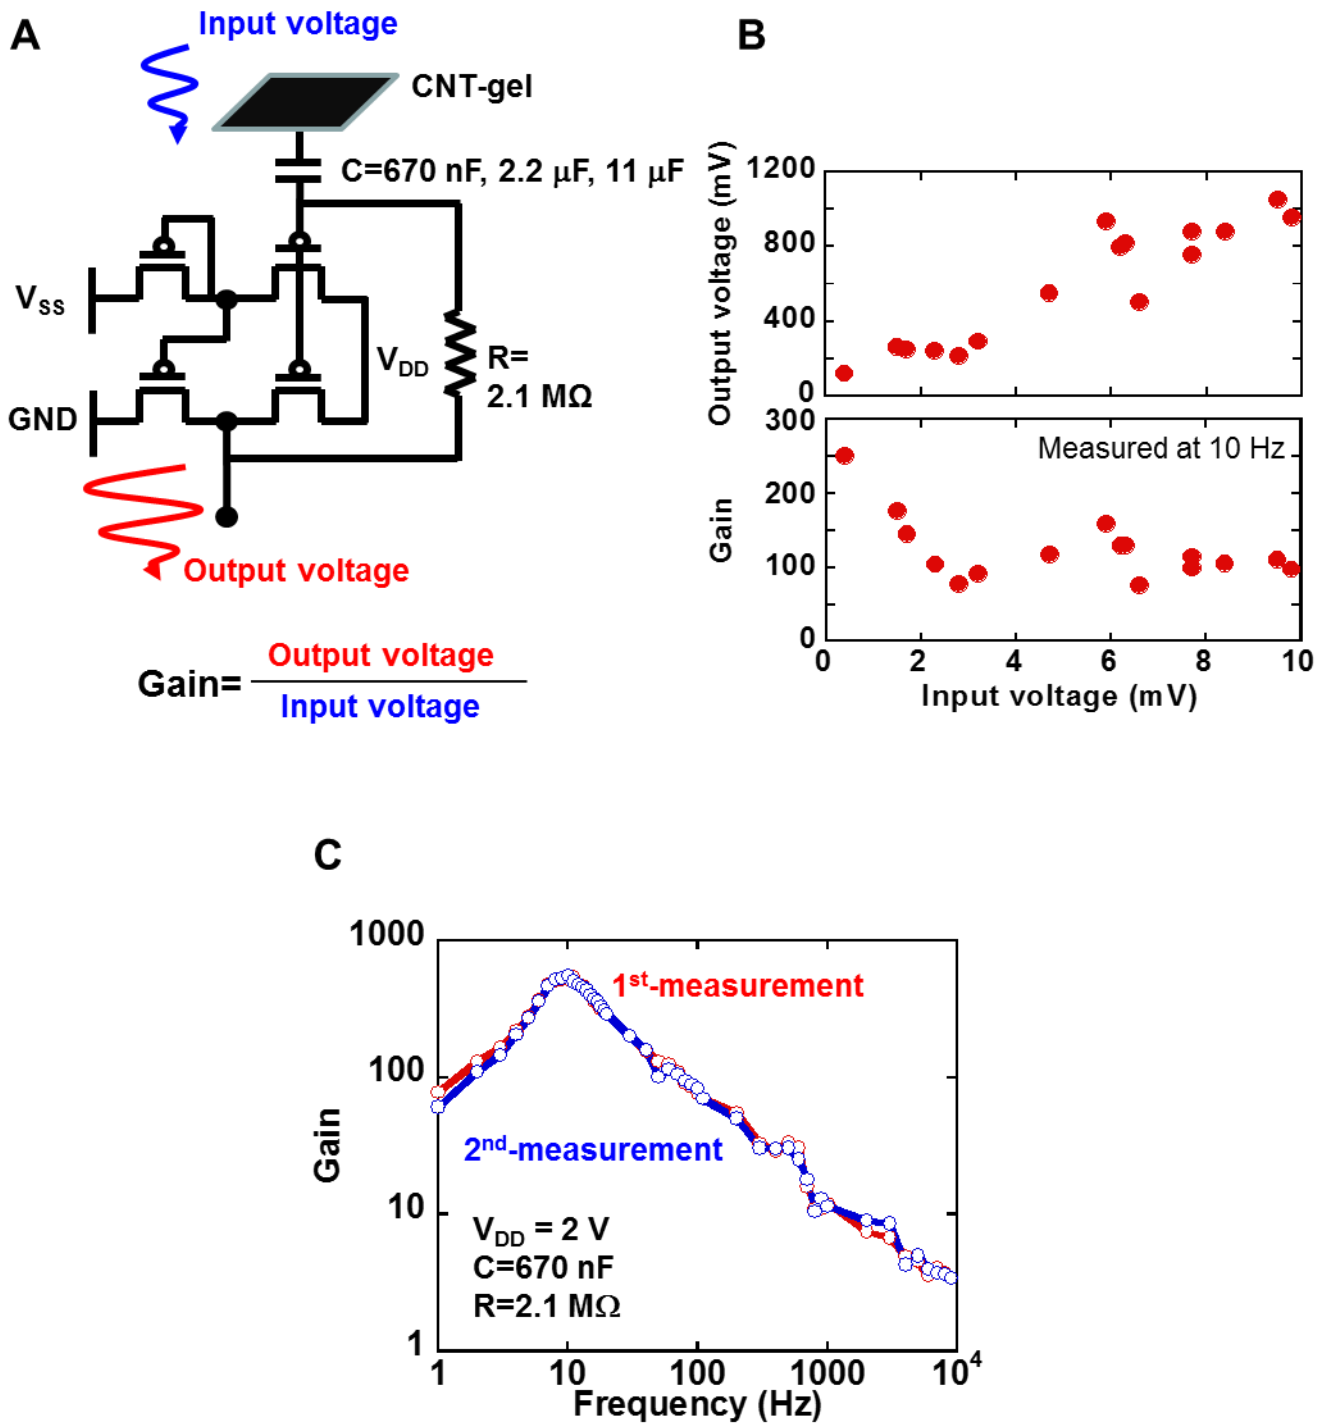

Supplementary Figure 21

Signal gain and frequency response of organic amplifiers

## Ischemia-induced myocardial infarction

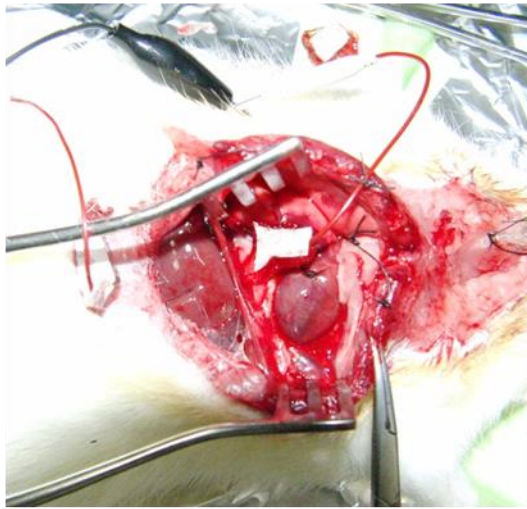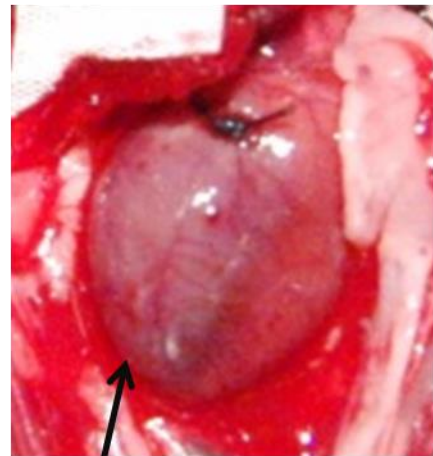

myocardial infarction

**Supplementary Figure 22**

**Detection of ischemic state due to myocardial infarction**

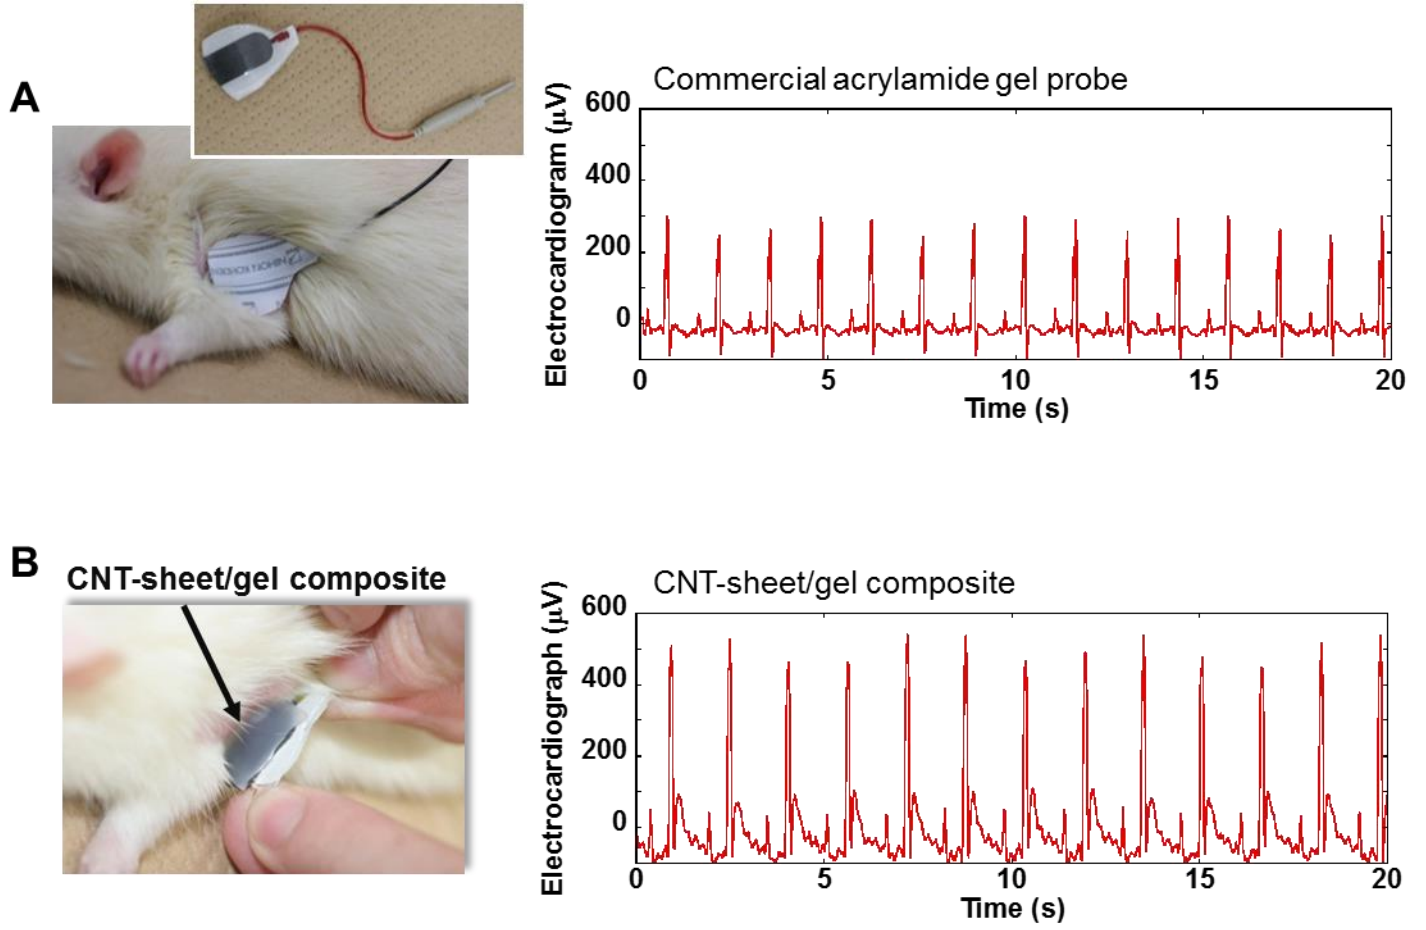

Supplementary Figure 23

Effects of the CNT-sheet/gel-composite electrode

## A

(I) Colony forming ability (%) :  $\frac{\text{The number of colonies w/o processed well}}{\text{The number of cell seeding}} \times 100$

(II) Rate of relative colony formation (%) :

$\frac{\text{The number of colonies with processed well}}{\text{The number of colonies with control well}} \times 100$

(III)

| IC <sub>50</sub> value                     | Cell toxicity |
|--------------------------------------------|---------------|
| Negligible small change                    | None          |
| Higher than values from positive control B | Slight        |
| Values between positive control A and B    | Moderate      |
| Lower than values from positive control A  | Severe        |

## B

Rate of relative colony formation and IC<sub>50</sub> value of V79 cells processed with the following extraction liquids

| Sample                                     | Concentration (%) | The number of colonies (count / well) |        |        |      |      | Rate of relative colony formation (%) | IC <sub>50</sub> value (%) |
|--------------------------------------------|-------------------|---------------------------------------|--------|--------|------|------|---------------------------------------|----------------------------|
|                                            |                   | Well 1                                | Well 2 | Well 3 | Mean | S.D. |                                       |                            |
| Negative control (Fresh MO5 culture media) | 0                 | 101                                   | 90     | 89     | 93   | 7    | 100.0                                 | –                          |
| Gel                                        | 20                | 92                                    | 97     | 92     | 94   | 3    | 101.1                                 | – <sup>a</sup>             |
|                                            | 40                | 97                                    | 92     | 82     | 90   | 8    | 96.8                                  |                            |
|                                            | 60                | 97                                    | 87     | 80     | 88   | 9    | 94.6                                  |                            |
|                                            | 80                | 94                                    | 104    | 91     | 96   | 7    | 103.2                                 |                            |
|                                            | 100               | 75                                    | 86     | 89     | 83   | 7    | 89.2                                  |                            |
| Gel + ionic liquid                         | 20                | 98                                    | 101    | 90     | 96   | 6    | 103.2                                 |                            |
|                                            | 40                | 73                                    | 91     | 91     | 85   | 10   | 91.4                                  |                            |
|                                            | 60                | 82                                    | 97     | 98     | 92   | 9    | 98.9                                  |                            |
|                                            | 80                | 86                                    | 80     | 89     | 85   | 5    | 91.4                                  |                            |
|                                            | 100               | 83                                    | 80     | 82     | 82   | 2    | 88.2                                  |                            |
| Gel + ionic liquid + CNT                   | 20                | 99                                    | 88     | 74     | 87   | 13   | 93.5                                  |                            |
|                                            | 40                | 83                                    | 86     | 78     | 82   | 4    | 88.2                                  |                            |
|                                            | 60                | 72                                    | 92     | 91     | 85   | 11   | 91.4                                  |                            |
|                                            | 80                | 95                                    | 84     | 89     | 89   | 6    | 95.7                                  |                            |
|                                            | 100               | 97                                    | 77     | 76     | 83   | 12   | 89.2                                  |                            |

a : No decreases were observed on the rate of relative colony formation, as a result that IC<sub>50</sub> value cannot be estimated.

Rate of relative colony formation and IC<sub>50</sub> value of V79 cells processed with the following control extraction liquids

| Control sample                                                                | Concentration (%) | The number of colonies (count / well) |        |        |      |      | Rate of relative colony formation (%) | IC <sub>50</sub> value (%) |
|-------------------------------------------------------------------------------|-------------------|---------------------------------------|--------|--------|------|------|---------------------------------------|----------------------------|
|                                                                               |                   | Well 1                                | Well 2 | Well 3 | Mean | S.D. |                                       |                            |
| Negative control (Fresh MO5 cultivate media)                                  | 0                 | 101                                   | 90     | 89     | 93   | 7    | 100.0                                 | –                          |
| Negative control (Polyethylene film)                                          | 25                | 99                                    | 83     | 95     | 92   | 8    | 98.9                                  | – <sup>a</sup>             |
|                                                                               | 50                | 104                                   | 87     | 81     | 91   | 12   | 97.8                                  |                            |
|                                                                               | 75                | 106                                   | 83     | 89     | 93   | 12   | 100.0                                 |                            |
|                                                                               | 100               | 95                                    | 81     | 72     | 83   | 12   | 89.2                                  |                            |
| Positive control A (Polyurethane film with 0.1%-zinc diethyldithiocarbamate)  | 0.5               | 42                                    | 53     | 49     | 48   | 6    | 51.6                                  | 0.52                       |
|                                                                               | 1                 | 0                                     | 0      | 0      | 0    | 0    | 0.0                                   |                            |
|                                                                               | 2                 | 0                                     | 0      | 0      | 0    | 0    | 0.0                                   |                            |
|                                                                               | 5                 | 0                                     | 0      | 0      | 0    | 0    | 0.0                                   |                            |
|                                                                               | 10                | 0                                     | 0      | 0      | 0    | 0    | 0.0                                   |                            |
| Positive control B (Polyurethane film with 0.25%-zinc dibutyldithiocarbamate) | 40                | 96                                    | 101    | 93     | 97   | 4    | 104.3                                 | 61                         |
|                                                                               | 50                | 92                                    | 97     | 88     | 92   | 5    | 98.9                                  |                            |
|                                                                               | 60                | 53                                    | 51     | 46     | 50   | 4    | 53.8                                  |                            |
|                                                                               | 80                | 1                                     | 0      | 0      | 0    | 1    | 0.0                                   |                            |
|                                                                               | 100               | 0                                     | 0      | 0      | 0    | 0    | 0.0                                   |                            |

a : No decreases were observed on the rate of relative colony formation, as a result that IC<sub>50</sub> value cannot be estimated.

## Supplementary Table 1

### Colony-forming assay for cytotoxic evaluation



ROTA → Polyrotaxane-based gel

CNT → Multiwall carbon nanotube

IL → Ionic liquid (N,N-Diethyl-N-methyl-N-(2-methoxyethyl) ammonium tetrafluoroborate)

HEMA → Poly-hydroxyethyl methacrylate gel

**A**

Appendix 1 One-week implantation

| Cell type/response      | ROTA  |       |       |       | ROTA-IL |       |       |       | ROTA-CNT |       |       |       | ROTA-IL-CNT |       |       |       |
|-------------------------|-------|-------|-------|-------|---------|-------|-------|-------|----------|-------|-------|-------|-------------|-------|-------|-------|
|                         | 00101 | 00102 | 00103 | 00104 | 00101   | 00102 | 00103 | 00104 | 00101    | 00102 | 00103 | 00104 | 00101       | 00102 | 00103 | 00104 |
| Polymorphonuclear cells | 2     | 2     | 3     | 3     | 2       | 1     | 3     | 3     | 4        | 2     | 3     | 3     | 3           | 2     | 3     | 2     |
| Lymphocytes             | 1     | 1     | 1     | 1     | 1       | 1     | 1     | 1     | 0        | 1     | 1     | 1     | 1           | 1     | 1     | 1     |
| Plasma cells            | 0     | 0     | 0     | 0     | 0       | 0     | 0     | 0     | 0        | 0     | 0     | 0     | 0           | 0     | 0     | 0     |
| Macrophages             | 3     | 3     | 2     | 2     | 2       | 2     | 2     | 2     | 2        | 3     | 3     | 3     | 2           | 3     | 3     | 3     |
| Giant cells             | 0     | 0     | 0     | 0     | 0       | 1     | 0     | 0     | 1        | 1     | 1     | 0     | 1           | 1     | 0     | 1     |
| Necrosis                | 1     | 2     | 2     | 2     | 1       | 2     | 2     | 3     | 2        | 1     | 2     | 2     | 1           | 1     | 2     | 1     |
| SUB TOTAL (X2)          | 14    | 16    | 16    | 16    | 12      | 14    | 16    | 18    | 18       | 16    | 20    | 18    | 16          | 16    | 18    | 16    |
| Neovascularisation      | 1     | 1     | 0     | 0     | 0       | 0     | 0     | 0     | 0        | 0     | 1     | 0     | 1           | 0     | 0     | 0     |
| Fibrosis                | 2     | 2     | 1     | 1     | 1       | 1     | 1     | 1     | 1        | 1     | 1     | 1     | 1           | 1     | 1     | 1     |
| Fatty infiltrate        | 0     | 0     | 0     | 0     | 0       | 0     | 0     | 0     | 0        | 0     | 0     | 0     | 0           | 0     | 0     | 0     |
| SUB TOTAL               | 3     | 3     | 1     | 1     | 1       | 1     | 1     | 1     | 1        | 1     | 2     | 1     | 2           | 1     | 1     | 1     |
| TOTAL                   | 70    |       |       |       | 64      |       |       |       | 77       |       |       |       | 71          |       |       |       |
| AVERAGE                 | 17.5  |       |       |       | 16.0    |       |       |       | 19.3     |       |       |       | 17.8        |       |       |       |

| Cell type/response      | HEMA  |       |       |       | HEMA-CNT |       |       |       | HEMA-IL-CNT |       |       |       | Au    |       |       |       | Negative control |       |       |       |
|-------------------------|-------|-------|-------|-------|----------|-------|-------|-------|-------------|-------|-------|-------|-------|-------|-------|-------|------------------|-------|-------|-------|
|                         | 00101 | 00102 | 00103 | 00104 | 00101    | 00102 | 00103 | 00104 | 00101       | 00102 | 00103 | 00104 | 00101 | 00102 | 00103 | 00104 | 00101            | 00102 | 00103 | 00104 |
| Polymorphonuclear cells | 3     | 4     | 3     | 1     | 2        | 2     | 4     | 3     | 3           | 4     | 3     | 4     | 3     | 3     | 4     | 3     | 2                | 2     | 1     | 1     |
| Lymphocytes             | 1     | 1     | 1     | 0     | 1        | 1     | 1     | 1     | 1           | 1     | 1     | 1     | 0     | 1     | 0     | 0     | 0                | 1     | 1     | 1     |
| Plasma cells            | 0     | 0     | 0     | 0     | 0        | 0     | 0     | 0     | 0           | 0     | 0     | 0     | 0     | 0     | 0     | 0     | 0                | 0     | 0     | 0     |
| Macrophages             | 2     | 3     | 2     | 2     | 3        | 3     | 3     | 2     | 3           | 3     | 3     | 3     | 2     | 3     | 3     | 2     | 3                | 3     | 2     | 2     |
| Giant cells             | 0     | 0     | 0     | 0     | 0        | 0     | 0     | 0     | 0           | 0     | 0     | 0     | 0     | 0     | 0     | 0     | 0                | 0     | 0     | 0     |
| Necrosis                | 1     | 2     | 2     | 1     | 2        | 2     | 2     | 1     | 2           | 2     | 2     | 1     | 1     | 2     | 2     | 2     | 2                | 2     | 1     | 2     |
| SUB TOTAL (X2)          | 14    | 20    | 16    | 8     | 16       | 16    | 20    | 14    | 18          | 20    | 18    | 18    | 12    | 18    | 18    | 14    | 14               | 16    | 10    | 12    |
| Neovascularisation      | 0     | 0     | 0     | 0     | 1        | 0     | 0     | 0     | 0           | 0     | 0     | 0     | 0     | 0     | 0     | 0     | 0                | 0     | 0     | 0     |
| Fibrosis                | 1     | 1     | 1     | 2     | 1        | 1     | 1     | 1     | 1           | 1     | 1     | 1     | 1     | 2     | 1     | 1     | 0                | 1     | 0     | 1     |
| Fatty infiltrate        | 0     | 0     | 0     | 0     | 0        | 0     | 0     | 0     | 0           | 0     | 0     | 0     | 0     | 0     | 0     | 0     | 0                | 0     | 0     | 0     |
| SUB TOTAL               | 1     | 1     | 1     | 2     | 2        | 1     | 1     | 1     | 1           | 1     | 1     | 1     | 1     | 2     | 1     | 1     | 0                | 1     | 0     | 1     |
| TOTAL                   | 63    |       |       |       | 71       |       |       |       | 78          |       |       |       | 67    |       |       |       | 54               |       |       |       |
| AVERAGE                 | 15.8  |       |       |       | 17.8     |       |       |       | 19.5        |       |       |       | 16.8  |       |       |       | 13.5             |       |       |       |

**B**

Appendix 2 4-week implantation

| Cell type/response      | ROTA  |       |       |       | ROTA-IL |       |       |       | ROTA-CNT |       |       |       | ROTA-IL-CNT |       |       |       |
|-------------------------|-------|-------|-------|-------|---------|-------|-------|-------|----------|-------|-------|-------|-------------|-------|-------|-------|
|                         | 00105 | 00106 | 00107 | 00108 | 00105   | 00106 | 00107 | 00108 | 00105    | 00106 | 00107 | 00108 | 00105       | 00106 | 00107 | 00108 |
| Polymorphonuclear cells | 1     | 2     | 1     | 2     | 1       | 0     | 1     | 1     | 0        | 2     | 0     | 2     | 1           | 1     | 0     | 0     |
| Lymphocytes             | 1     | 2     | 3     | 2     | 2       | 1     | 2     | 3     | 2        | 3     | 1     | 2     | 3           | 1     | 2     | 1     |
| Plasma cells            | 0     | 1     | 1     | 0     | 0       | 0     | 1     | 0     | 0        | 0     | 0     | 0     | 0           | 1     | 0     | 0     |
| Macrophages             | 3     | 3     | 4     | 2     | 3       | 3     | 3     | 3     | 3        | 3     | 3     | 3     | 3           | 2     | 3     | 3     |
| Giant cells             | 1     | 0     | 0     | 0     | 0       | 1     | 0     | 0     | 2        | 1     | 1     | 1     | 1           | 0     | 1     | 1     |
| Necrosis                | 0     | 0     | 1     | 0     | 1       | 1     | 0     | 1     | 0        | 1     | 1     | 0     | 1           | 1     | 0     | 0     |
| SUB TOTAL (X2)          | 12    | 16    | 20    | 12    | 14      | 12    | 14    | 16    | 14       | 20    | 12    | 16    | 18          | 12    | 12    | 10    |
| Neovascularisation      | 1     | 2     | 1     | 1     | 0       | 0     | 1     | 0     | 1        | 2     | 0     | 1     | 2           | 1     | 0     | 0     |
| Fibrosis                | 2     | 2     | 2     | 1     | 1       | 1     | 2     | 1     | 2        | 2     | 1     | 2     | 2           | 1     | 1     | 2     |
| Fatty infiltrate        | 0     | 0     | 0     | 0     | 0       | 0     | 0     | 0     | 0        | 0     | 0     | 0     | 0           | 0     | 0     | 0     |
| SUB TOTAL               | 3     | 4     | 3     | 2     | 1       | 1     | 3     | 1     | 3        | 4     | 1     | 3     | 4           | 2     | 1     | 2     |
| TOTAL                   | 72    |       |       |       | 62      |       |       |       | 73       |       |       |       | 61          |       |       |       |
| AVERAGE                 | 18.0  |       |       |       | 15.5    |       |       |       | 18.3     |       |       |       | 15.3        |       |       |       |

| Cell type/response      | HEMA  |       |       |       | HEMA-CNT |       |       |       | HEMA-IL-CNT |       |       |       | Au    |       |       |       | Negative control |       |       |       |
|-------------------------|-------|-------|-------|-------|----------|-------|-------|-------|-------------|-------|-------|-------|-------|-------|-------|-------|------------------|-------|-------|-------|
|                         | 00105 | 00106 | 00107 | 00108 | 00105    | 00106 | 00107 | 00108 | 00105       | 00106 | 00107 | 00108 | 00105 | 00106 | 00107 | 00108 | 00105            | 00106 | 00107 | 00108 |
| Polymorphonuclear cells | 2     | 1     | 0     | 1     | 2        | 2     | 1     | 0     | 1           | 3     | 1     | 2     | 2     | 1     | 2     | 2     | 0                | 0     | 0     | 0     |
| Lymphocytes             | 2     | 2     | 2     | 1     | 2        | 3     | 1     | 2     | 3           | 3     | 3     | 3     | 3     | 3     | 3     | 2     | 0                | 0     | 0     | 0     |
| Plasma cells            | 1     | 1     | 0     | 0     | 1        | 0     | 0     | 0     | 0           | 1     | 0     | 0     | 3     | 2     | 1     | 1     | 0                | 0     | 0     | 0     |
| Macrophages             | 3     | 3     | 3     | 1     | 3        | 3     | 2     | 3     | 3           | 3     | 3     | 3     | 2     | 2     | 3     | 3     | 1                | 1     | 2     | 1     |
| Giant cells             | 1     | 0     | 1     | 0     | 0        | 0     | 0     | 0     | 1           | 1     | 1     | 0     | 0     | 0     | 0     | 0     | 0                | 0     | 0     | 0     |
| Necrosis                | 1     | 0     | 0     | 0     | 1        | 0     | 0     | 0     | 1           | 2     | 0     | 1     | 1     | 0     | 1     | 0     | 0                | 0     | 0     | 0     |
| SUB TOTAL (X2)          | 20    | 14    | 12    | 6     | 18       | 16    | 8     | 10    | 18          | 26    | 16    | 18    | 22    | 16    | 20    | 16    | 2                | 2     | 4     | 2     |
| Neovascularisation      | 1     | 0     | 0     | 0     | 2        | 2     | 0     | 0     | 2           | 2     | 2     | 2     | 2     | 1     | 0     | 0     | 0                | 0     | 0     | 0     |
| Fibrosis                | 1     | 1     | 1     | 2     | 1        | 3     | 1     | 1     | 2           | 2     | 3     | 3     | 3     | 3     | 2     | 3     | 1                | 1     | 2     | 2     |
| Fatty infiltrate        | 0     | 0     | 0     | 0     | 0        | 0     | 0     | 0     | 0           | 0     | 0     | 0     | 0     | 0     | 0     | 0     | 0                | 0     | 0     | 0     |
| SUB TOTAL               | 2     | 1     | 1     | 2     | 3        | 5     | 1     | 1     | 4           | 4     | 5     | 5     | 5     | 4     | 2     | 3     | 1                | 1     | 2     | 2     |
| TOTAL                   | 58    |       |       |       | 62       |       |       |       | 96          |       |       |       | 88    |       |       |       | 16               |       |       |       |
| AVERAGE                 | 14.5  |       |       |       | 15.5     |       |       |       | 24.0        |       |       |       | 22.0  |       |       |       | 4.0              |       |       |       |

**Supplementary Table 2**

More quantitative data analysed from the pathology grafts and a summary of the results 1

ROTA → Polyrotaxane-based gel  
 CNT → Multiwall carbon nanotube  
 IL → Ionic liquid (N,N-Diethyl-N-methyl-N-(2-methoxyethyl) ammonium tetrafluoroborate)  
 HEMA → Poly-hydroxyethyl methacrylate gel

|                            | Average irritant ranking score | $\Delta$ between test sample and control <sup>a</sup> | Non-irritant (0.0 up to 2.9)       |
|----------------------------|--------------------------------|-------------------------------------------------------|------------------------------------|
|                            |                                |                                                       | Slight irritant (3.0 up to 8.9)    |
|                            |                                |                                                       | Moderate irritant (9.0 up to 15.0) |
|                            |                                |                                                       | Severe irritant (>15)              |
| <b>1-week implantation</b> |                                |                                                       |                                    |
| Negative control           | 13.5                           | -                                                     | -                                  |
| ROTA                       | 17.5                           | 4.0                                                   | Slight irritant                    |
| ROTA-IL                    | 16.0                           | 2.5                                                   | Non-irritant                       |
| ROTA-CNT                   | 19.3                           | 5.8                                                   | Slight irritant                    |
| ROTA-IL-CNT                | 17.8                           | 4.3                                                   | Slight irritant                    |
| HEMA                       | 15.8                           | 2.3                                                   | Non-irritant                       |
| HEMA-CNT                   | 17.8                           | 4.3                                                   | Slight irritant                    |
| HEMA-IL-CNT                | 19.5                           | 6.0                                                   | Slight irritant                    |
| Au                         | 16.8                           | 3.3                                                   | Slight irritant                    |
| <b>4-week implantation</b> |                                |                                                       |                                    |
| Negative control           | 4.0                            | -                                                     | -                                  |
| ROTA                       | 18.0                           | 14.0                                                  | Moderate irritant                  |
| ROTA-IL                    | 15.5                           | 11.5                                                  | Moderate irritant                  |
| ROTA-CNT                   | 18.3                           | 14.3                                                  | Moderate irritant                  |
| ROTA-IL-CNT                | 15.3                           | 11.3                                                  | Moderate irritant                  |
| HEMA                       | 14.5                           | 10.5                                                  | Moderate irritant                  |
| HEMA-CNT                   | 15.5                           | 11.5                                                  | Moderate irritant                  |
| HEMA-IL-CNT                | 24.0                           | 20.0                                                  | Severe irritant                    |
| Au                         | 22.0                           | 18.0                                                  | Severe irritant                    |

<sup>a</sup>: Negative difference is recorded as zero.

**Supplementary Table 3**

**more quantitative data analysed from the pathology grafts and a summary of the results 2**
